1 **NADPH Oxidase 2 Derived Reactive Oxygen Species Promote CD8<sup>+</sup> T cell Effector Function**

2

3 Running Title: NADPH Oxidase 2 ROS promote CD8 T cell function

4

5 Jing Chen \*†, Chao Liu \*†, Anna V. Chernatynskaya \*, Brittney Newby \*, Todd M. Brusko \*, Yuan Xu  
6 ‡, Nadine Morgan §, Christopher P. Santarlas¶§, Westley H. Reeves ‡, Hubert M. Tse §, Jennifer W.

7 Leiding ¶§, and Clayton E. Mathews \*

8

9 \*Department of Pathology, Immunology and Laboratory Medicine and ‡Department of Medicine,  
10 University of Florida, Gainesville, FL 32610, USA

11 §Department of Microbiology, University of Alabama at Birmingham, Birmingham, AL 35294,  
12 USA

13 ¶Department of Pediatrics, Division of Allergy and Immunology, University of South Florida, and  
14 §Johns Hopkins All Children's Hospital, St. Petersburg, FL 33701, USA

15 † - J.C. and C.L. contributed equally to this manuscript.

16

17 Send correspondence to: Clayton E. Mathews, Ph.D.

18 Department of Pathology, Immunology and Laboratory Medicine

19 The University of Florida College of Medicine

20 University of Florida

21 PO Box 100275, Gainesville, FL 32610-0275

22 Phone: 352-273-9269

23 E-mail: cxm@ufl.edu

24

1 **ABSTRACT**

2

3 Oxidants participate in lymphocyte activation and function. We previously demonstrated that  
4 eliminating the activity of NADPH oxidase 2 (NOX2) significantly impaired the effectiveness of  
5 autoreactive CD8<sup>+</sup> cytotoxic T lymphocytes (CTL). However, the molecular mechanisms impacting  
6 CTL function remain unknown. Here, we studied the role of NOX2 in both non-obese diabetic (NOD)  
7 mouse and human CTL function. Genetic ablation or chemical inhibition of NOX2 in CTL significantly  
8 suppressed activation-induced expression of the transcription factor T-bet, the master transcription factor  
9 of the Tc1 cell lineage, and T-bet target effectors genes such as IFN $\gamma$  and granzyme B. Inhibition of  
10 NOX2 in both human and mouse CTL prevented target cell lysis. We identified that superoxide  
11 generated by NOX2 must be converted into hydrogen peroxide to transduce the redox signal in CTL.  
12 Further, we show that NOX2-generated oxidants deactivate the Tumor Suppressor Complex leading to  
13 mTOR complex 1 activation and CTL effector function. These results indicate that NOX2 plays a non-  
14 redundant role in T cell receptor-mediated CTL effector function.

15

## 1 INTRODUCTION

2 Cytotoxic CD8<sup>+</sup> T lymphocytes (CTL) play vital roles in anti-tumor immunity, elimination of  
3 intracellular infections, and the pathogenesis of autoimmune diseases, including type 1 diabetes (T1D)  
4 (1, 2). Activation of CTL leads to cell expansion, differentiation, and downstream production of pro-  
5 inflammatory cytokines and cytotoxic factors, which are critical to induce cell death in antigen-bearing  
6 target cells. During CTL activation, multiple factors function collaboratively to control the master  
7 transcription factors that regulate effector function (3-5). Reactive oxygen species (ROS), a group of low  
8 molecular weight highly reactive molecules containing oxygen (6), have been proposed as one of the  
9 signal transducers for CTL activation and differentiation (7, 8).

10 At high concentrations, ROS can be toxic and participate in pathologies; however, regulated  
11 ROS production controls cellular functions by mediating redox signaling (6, 9, 10). Specific enzyme  
12 families, such as the NADPH oxidases (9), can modulate redox signal transduction through production  
13 of ROS. NOX2 is expressed in a wide variety of tissues/cell types and is the free radical source of the  
14 “respiratory burst” used by neutrophils and macrophages to destroy microbes and as a biological second  
15 messenger for signal transduction within lymphocytes (9, 10). We have reported that NOX2 regulates  
16 CD4<sup>+</sup> T cell differentiation by promoting T<sub>H</sub>1 responses (11), a finding confirmed by subsequent studies  
17 with human samples (12). In addition, we have observed a CD8<sup>+</sup> T cell intrinsic role of NOX2 that is  
18 essential for autoimmune diabetes initiation (8). Ergo, our data as well as those from other groups  
19 support an important role of NOX2 in adaptive immune function in addition to the well-established role  
20 of NOX2 in innate immunity (13, 14). The goal of the current study is to elucidate the mechanisms of  
21 NOX2 in regulating CD8<sup>+</sup> T cell effector function.

22 T1D is caused by an autoimmune-mediated destruction of insulin-producing  $\beta$  cells (15-20).  
23 CTL are considered the final effector cells of  $\beta$  cell death in the non-obese diabetic (NOD) mouse (19,  
24 21-24). CTL induce  $\beta$  cell death by utilizing pro-inflammatory cytokines and cytotoxic effector

1 molecules such as IFN $\gamma$  and TNF $\alpha$ , perforin, and granzyme B. We reported that NOX2 produced ROS  
2 contribute to the onset of diabetes in NOD mice using a NOD strain that encodes a non-functional  
3 NOX2 enzyme [NOD-*Ncf1<sup>m1J</sup>*] (8, 11, 25). Adoptive transfer of CTLs from NOX2-deficient NOD-  
4 *Ncf1<sup>m1J</sup>* donors into NOX2 intact recipients (NOD-*Scid*) resulted in a delayed onset of diabetes,  
5 indicating that NOX2 activity within the CTL is required for pathogenesis (8).

6         Production of pro-inflammatory cytokines and effector molecules as well as cytotoxic activity of  
7 human and mouse CTL are shown here to be blocked by genetic ablation or pharmacological inhibition  
8 of NOX2. Hydrogen peroxide derived from NOX2 promoted CTL effector function by enhancing the  
9 production of T-bet, the master transcription factor of the Tc1 cell lineage and driver of effectors genes  
10 such as IFN $\gamma$  and granzyme B. ROS affected T-bet by regulating mTOR complex 1 (mTORc1) activity  
11 via Rheb-GTP levels through the redox sensitive Tsc1/Tsc2 signaling complex. Collectively, these  
12 findings define a mechanism by which NOX2 functions in CTL and highlights the significance of redox  
13 signaling in CTL-mediated diseases.

14

## 1 MATERIALS AND METHODS

### 2 Animals

3 NOD-*Ncf1<sup>m1J</sup>* mice, described previously (8, 11, 25), were bred and maintained at the University  
4 of Florida. All other mouse strains (NOD/ShiLtJ (NOD), NOD.CB17-*Prkdc<sup>scid</sup>/J* (NOD-*Scid*), NOD.Cg-  
5 *Rag1<sup>tm1Mom</sup>-Tg* (TcraAI4)<sup>1Dvs/DvsJ</sup> (NOD.AI4 $\alpha$ -*Rag1<sup>-/-</sup>*), NOD.Cg-*Rag1<sup>tm1Mom</sup>Tg* (TcrbAI4)<sup>1Dvs/DvsJ</sup>  
6 (NOD.AI4 $\beta$ -*Rag1<sup>-/-</sup>*) as well as C57BL6/J (B6) mice) were purchased from The Jackson Laboratory (Bar  
7 Harbor, ME. F1 hybrid progeny were developed from outcrosses of NOD.AI4 $\alpha$ -*Rag1<sup>-/-</sup>* to NOD.AI4 $\beta$ -  
8 *Rag1<sup>-/-</sup>* and referred to as NOD.AI4 $\alpha/\beta$ -*Rag1<sup>-/-</sup>*. Female mice were used for all experiments. All mice  
9 used in this study were housed in specific pathogen free facilities and all procedures were approved by  
10 the University of Florida institution animal care and use committee.

11

### 12 Human Subjects

13 The Institutional Review Board of the University of Florida approved all studies with human  
14 samples. Leukopaks from healthy donors (50% female, age 16-25 years, median 19) were purchased  
15 from Life South Blood Centers. PBMCs were isolated using Ficoll gradient method.

16

### 17 Materials

18 Chemicals were purchased from Sigma-Aldrich. HRP conjugated secondary antibodies were  
19 purchased from Santa Cruz Biotechnology. Details of Fluorescently labeled antibodies used in flow  
20 cytometry analysis with Fortessa or Cytex Aurora are listed in Supplemental Material.

21

22

## 1 **Purification and Cell Culture of Mouse CTL**

2 Splens from age-matched NOD, NOD-*Ncf1<sup>m1J</sup>* and B6 females were collected, homogenized to  
3 a single cell suspension and subjected to hemolysis with Gey's solution(26). CTL were negatively  
4 selected using paramagnetic beads following column selection (CD8<sup>+</sup> T cell isolation kit (Miltenyi  
5 Biotec)). Purity was greater than 90% and confirmed on a BD LSR Fortessa (BD Biosciences). Purified  
6 CTL were cultured in complete DMEM. All cultures using mouse T cells were performed in complete  
7 DMEM (Low glucose (5.5mM) DMEM (Corning Cellgro) containing 10% fetal bovine serum (FBS,  
8 HyClone Laboratories), HEPES buffer, gentamicin (Gemini), MEM Non-Essential Amino Acids  
9 Solution (Life Technologies) and 2-mercaptoethanol.

10

## 11 **Immuno-Spin Trapping and Immunofluorescence**

12 Macromolecular-centered free radicals were detected after stimulation of purified NOD and  
13 NOD-*Ncf1<sup>m1J</sup>* CD8<sup>+</sup> T cells with  $\alpha$ -CD3 (clone 145-2C11 (BD Pharmingen); 1 $\mu$ g/mL) and  $\alpha$ -CD28  
14 (clone 37.51(BD Pharmingen); 1 $\mu$ g/mL) in the presence of DMPO (1 mmol/L) in tissue culture–treated  
15 chamber slides. After 24 hours, cells were fixed in 4% paraformaldehyde in PBS, permeabilized with  
16 0.1% Triton X-100 + 0.1% Tween in PBS, blocked with 10% BSA in PBS, and incubated with chicken  
17 IgY anti-DMPO (20 $\mu$ g/mL) and rat IgY anti-mouse CD8a (1:250, SouthernBiotech). DMPO adducts  
18 were detected with Alexa Fluor 488–conjugated goat anti-chicken IgY secondary antibody (1:400;  
19 Jackson ImmunoResearch). CD8<sup>+</sup> T cells were identified with Cy3-conjugated donkey anti-rat  
20 secondary antibody (1:500; Jackson ImmunoResearch). Images were obtained with an Olympus IX81  
21 Inverted Microscope using a 403 objective and analyzed with cellSens Dimension imaging software,  
22 version 1.9. For quantitation of fluorescence intensity, three to six images were obtained for each data  
23 point. Each image was collected at the same exposure time, adjusted to the same intensity level for

1 standardization, and the fluorescence intensity was measured using ImageJ software (National Institutes  
2 of Health).

3

#### 4 **CTL proliferation**

5 CD8<sup>+</sup> T cells ( $1 \times 10^5$ ) were used for proliferation after stimulation with plate-bound  $\alpha$ -CD3 $\epsilon$   
6 (0.1  $\mu$ g/mL) and  $\alpha$ -CD28 (1  $\mu$ g/mL) or beads conjugated with  $\alpha$ -CD3 $\epsilon$  and  $\alpha$ -CD28 in the presence or  
7 absence of 200 $\mu$ M apocynin (ED Millipore). This dose of apocynin was used based on dose response  
8 curves using increasing concentrations of apocynin (0-300 $\mu$ M) and analyzing viability by flow  
9 cytometry (Live-Dead Near IR (ThermoFisher), Supplemental Figure 2A) and IFN $\gamma$  levels by ELISA  
10 (BD Biosciences) (Supplemental Figure 2B). Cell proliferation was measured by [<sup>3</sup>H]-thymidine (TdR)  
11 incorporation as described previously (11).

12

#### 13 **Detection of cytokine production and secretion by mouse CTL**

14 Purified CD8<sup>+</sup> T cells ( $5 \times 10^5$ ) from NOD, NOD-*Ncf1<sup>m1J</sup>*, and B6 mice were activated with plate  
15 bounded  $\alpha$ -CD3 $\epsilon$  and  $\alpha$ -CD28 or phorbol 12-myristate 13-acetate (PMA; 50ng/mL) plus ionomycin  
16 (1 $\mu$ g/mL) for a total of 72 hours, as previously described (27, 28). Cells were stained with BV421-  
17 labeled  $\alpha$ -CD8 and fixed then permeabilized prior to being stained with fluorescently labeled antibodies  
18 to IFN $\gamma$ , Granzyme B, and T-bet. Data were collected using a BD LSR Fortessa by gating on CD8<sup>+</sup> T  
19 cells and then producing histograms of the intracellular targets. Isotype controls and fluorescence minus  
20 one (FMO) conditions were used to set gates for marker positivity for the protein of interest. Results  
21 were analyzed by Flowjo 7.6.1-10.5.0 software.

22 For antigen-specific activation of mouse AI4 T cells, NOD.AI4 $\alpha/\beta$ -*Rag1<sup>-/-</sup>* splenocytes were  
23 activated with 0.1  $\mu$ M mimotope (amino acid sequence YFIENYLEL) and 25U/mL IL-2 for 72 hours

1 (29, 30) with or without the presence of 200  $\mu$ m apocynin. Cells were stained with LIVE/DEAD™  
2 Fixable Near-IR to exclude dead cells, blocked with Fc-block (BD Biosciences), and stained for surface  
3 markers CD3-PE-Cy5 (145-2C11, eBioscience), CD8-BV650 (53-6.7, Biolegend), CD62L-BV711  
4 (MEL-14, Biolegend) and CD69-PerCP-Cy5.5 (H1.2F3, BD Biosciences). Then cells were fixed and  
5 permeabilized using eBioscience™ FoxP3 / Transcription Factor Fixation/Permeabilization kit, and  
6 stained for p-S6K-PE (clone #215247, R&D Systems), Perforin-APC (S16009A, Biolegend), IFN $\gamma$ -  
7 FITC (XMG1.2, BD Biosciences), Granzyme B-PacBlue (GB11, Biolegend) and T-bet-BV605 (4B10,  
8 Biolegend). Data were analyzed on Aurora. Results were expressed as median fluorescence intensity  
9 (MFI) ratio to activated when gated on live CD3<sup>+</sup>CD8<sup>+</sup>.

10 Secreted IFN $\gamma$  was analyzed using CD8<sup>+</sup> T cells ( $5 \times 10^4$ ) that were stimulated with  $\alpha$ -CD3 $\epsilon$  and  
11  $\alpha$ -CD28 conjugated beads (Life Technologies). IFN $\gamma$  was detected with the BD OptEIA™ Mouse IFN $\gamma$   
12 ELISA Set (BD Biosciences). ELISA plates were read on a SpectraMax Multi-Mode Microplate Reader  
13 and analyzed using Softmax Pro v.5.0.1 (Molecular Devices Corp.).

14

### 15 **Quantitative Real-Time PCR (qRT-PCR)**

16 Total RNA from purified CD8<sup>+</sup> T cells was isolated with TRIzol reagent (Invitrogen). cDNA  
17 was prepared using the Superscript III First-Strand Synthesis System (Invitrogen) according to the  
18 manufacturer's protocol. Real-time quantitative PCR was performed as previously reported (31-33)  
19 using SYBR Green I (Bio-Rad) on a Roche LightCycler 480 II. The amplification program utilized the  
20 following steps for all primer sets: 95°C for 10 min, followed by 45 cycles of 95°C for 30s, 60°C for 30s  
21 and 72°C for 30s. The melting-curves of the PCR products were measured to ensure the specificity.  
22 Primers (Supplemental Table) were designed using qPrimerDepot (NIH).

23



## 1 **Mouse Cell-Mediated Lymphocytotoxicity (CML) Assays**

2 CML assays were performed as described previously (16, 18, 34, 35). Briefly, splenocytes from  
3 NOD.AI4 $\alpha$ / $\beta$ -*Rag1*<sup>-/-</sup> mice were primed in RPMI1640 complete media containing 25 U/mL IL-2 and  
4 0.1 $\mu$ M mimotope (amino acid sequence YFIENYLEL) for 3 days with (CTL Activation phase (+)) or  
5 without (CTL Activation phase (-)) 200 $\mu$ M apocynin. NOD-derived NIT-1  $\beta$  cells (36) were plated at  
6 10,000 cells per well in flat-bottom 96 well plates. NIT-1 cells were primed with 1000U/mL IFN $\gamma$  for 24  
7 hours. The NIT-1 cells were then labeled with 1  $\mu$ Ci/well of <sup>51</sup>Cr (Perkin Elmer) for 3 hours at 37°C and  
8 co-cultured with AI4 T cells at a E:T ratio of 20:1 for 16 hours, with (CTL Effector phase (+)) or  
9 without (CTL Effector phase (-)) the presence of 200  $\mu$ M apocynin. Specific lysis was calculated as  
10 described (16, 18, 34, 35).

11

## 12 **Detection of cytokine production by human CD8<sup>+</sup> T cells**

13 Purified total human T cells were cultured in complete RPMI. Culture media contained the  
14 indicated concentration of apocynin. Total T cells ( $1 \times 10^6$ ) were activated with plate bound  $\alpha$ -CD3 $\epsilon$   
15 (OKT3, Biologend) plus  $\alpha$ -CD28 (CD28.2 RUO, BD Biosciences) at 5 $\mu$ g/mL each or corresponding  
16 isotype controls for a total of 72 hours. For IFN $\gamma$  detection by ELISA, media supernatants were collected  
17 at 24, 48 and 72 hours and the IFN $\gamma$  levels determined using BD OptEIA Human IFN $\gamma$  ELISA set. For  
18 intracellular staining, cells were activated for 66 hours and then, re-stimulated with PMA (50ng/mL)  
19 plus ionomycin (1 $\mu$ g/mL) with the addition of GolgiStop (BD Biosciences) for 6 hours at 37°C in a 5%  
20 CO<sub>2</sub> humid air incubator. Cell proliferation was measured by [<sup>3</sup>H]TdR incorporation. In independent  
21 cultures, cells were stained with  $\alpha$ -human CD8-FITC (G42-8, BD Pharmingen), CD69-BV605 (FN50;  
22 Biologend), CD4-PE-Cy7 (RPA-T4; eBiosciences) followed by intracellular staining to detect IFN $\gamma$  -  
23 PerCP-Cy5.5 (4S.B3; Biologend), granzyme B-AF647 (GB11; Biologend), T-bet-Pacific Blue (4B10,  
24 Biologend) and EOMES-PE (WD1928; eBiosciences). Intracellular staining was performed with the

1 True Nuclear Transcription Factor staining kit (Biolegend) according to manufacturer's protocol.  
2 Fluorescence was measured using BD LSR Fortessa and results analyzed using Flowjo 7.6.1 software.

3 Leukopak PBMC were pretreated with Apocynin 400uM, DMSO 0.04%, or left untreated in  
4 cRPMI for 1 hr at 37C in a CO2 incubator. Cells were then activated with soluble  $\alpha$ -CD3 (1ug/mL) and  
5  $\alpha$ -CD28 (5ug/mL) or isotype antibodies, together with protein G (Sigma; 5ug/mL) as crosslinker for 10  
6 min at 37°C in a CO2 incubator. At the end of activation, the reaction was stopped by immediately  
7 adding 4X Fix stock, to reach 1X concentration of Fix buffer and fixed for 30 min. Samples were then  
8 stained for viability with LIVE/DEAD™ Fixable Yellow Dead Cell Stain Kit (Invitrogen), blocked with  
9 Fc-block (ThermoFisher), permeabilized with ice-cold 90% methanol, and stained for surface markers  
10 CD3-eFluor450 (UCHT1, eBioscience), CD4-FITC (RPA-T4, Biolegend), CD8-BV711 (SK1,  
11 Biolegend) as well as intracellular molecules Phospho-S6 (Ser235, Ser236)-PE (cupk43k,  
12 ThermoFisher) and Phospho-AKT1 (Ser473)-APC (SDRNR, ThermoFisher). Data were analyzed on  
13 Cyttek Aurora and results expressed as MFI ratio to activated when gated on Live/Dead\_Yellow  
14 CD3<sup>+</sup>CD4<sup>-</sup>CD8<sup>+</sup>.

15

### 16 **CML Assays Using Auto-reactive Human CD8<sup>+</sup> T cell Avatars and Human Derived BetaLox5** 17 **Cells as Target Cells.**

18 CD8<sup>+</sup> T cells were pre-enriched from LeukoPaks by negative selection (RosetteSep (StemCell  
19 Technologies)) and then stained with CD8-APC/Cy7 (Clone SK1, BioLegend), CD45RA-PerCP/Cy5  
20 (Clone H1100, BioLegend), and CD45RO-PE/Cy7 (Clone UCHL1, BioLegend). Naïve  
21 CD8<sup>+</sup>CD45RA<sup>+</sup>CD45RO<sup>-</sup> T cells were sorted using a BD FACS Aria III. Purified (91.0 ± 2.5% purity)  
22 naïve CD8<sup>+</sup> T cells were activated with  $\alpha$ -CD3/CD28 Dynabeads (Life Technologies) in the presence or  
23 absence of Apocynin (200 $\mu$ M). At 48 hr, cells were transduced with a lentiviral vector containing an  
24 IGRP-specific, HLA-A\*0201 restricted T Cell Receptor (TCR), as previously described (18). After  
25 transduction, CD8<sup>+</sup> avatars were supplemented with complete RPMI (Corning Cellgro) and IL-2

1 (300U/mL) with or without apocynin (200 $\mu$ M) every 48 hours. Transduction efficiency for the cells  
2 expanded in apocynin was 32.4% whereas those expanded in media free of apocynin were transduced at  
3 22.3%. After transduction cells were expanded for an additional 7 days and on day 9, the cells were  
4 cryopreserved in freeze medium (90% FBS/10% DMSO). Cells were thawed prior to and immediately  
5 used for the CML assays. CML assays were performed as described previously using BetaLox5 (BL5)  
6 cells as target (18, 34).

7

### 8 **Measurement of mTOR Complex Activity**

9 mTOR1 complex activity analysis was performed using purified CD8<sup>+</sup> T cells ( $1 \times 10^7$ ) from  
10 NOD and NOD-*Ncf1<sup>m1J</sup>* mice. Western blotting was used as the output assay to determine levels of the  
11 ribosomal protein S6 kinase (p-S6K) using an S6K and p-S6K antibodies (Cell Signaling Technology).  
12 To assess the impact of mTOR1 inhibition rapamycin (20ng/mL) treatment was performed 15 min prior  
13 to polyclonal activation of T cells. For redox reagent treatment, purified CD8<sup>+</sup> T cells were exposed to  
14 either 5  $\mu$ M phenylarsine oxide (PAO), 1 mM 2,3-dimercapto-1-propanol (British anti-Lewisite (BAL)),  
15 10  $\mu$ M H<sub>2</sub>O<sub>2</sub>, or 200  $\mu$ M Apocynin 15 min before activation. All treatments were performed in complete  
16 DMEM media. T cells were then activated with  $\alpha$ -CD3 $\epsilon$  and  $\alpha$ -CD28 conjugated beads for 30 minutes.  
17 Cell lysates were then generated by sonication in RIPA buffer and subjected to western blot for p-S6K  
18 and total S6K. Lysates were separated on 7.5% (Bio-Rad) and transferred to 0.45- $\mu$ m-charged PVDF  
19 membranes. Membranes were incubated overnight at 4°C with antibodies against phospho-S6K or total  
20 S6K and then exposed to the secondary antibody conjugated to HRP. For normalization, membranes  
21 were stripped and re-probed with  $\alpha$ -Erk1, followed by incubation with HRP conjugated secondary  
22 antibody. Chemiluminescence was detected and photon signals converted to densitometry data with a  
23 FluorChem HD2 with AlphaView software (Alpha Innotech). Antigen-specific activation-induced p-  
24 S6K activity was also confirmed via flow cytometry, as noted above.

1

## 2 **Measurement of Akt activity and Rheb-GTP levels after T Cell Activation**

3           Purified CD8<sup>+</sup> T cells ( $2 \times 10^7$ ) from NOD and NOD-*Ncf1<sup>m1J</sup>* mice were left unstimulated or  
4 subjected to stimulation with  $\alpha$ -CD3 $\epsilon$  and  $\alpha$ -CD28 conjugated beads for 30 min. Akt kinase activity was  
5 measured using an Akt Kinase Activity Assay Kit (Cell Signaling Technology). Rheb-GTP levels were  
6 assessed using a Rheb Activation Assay Kit (New East Biosciences). p-AKT and p-S6 activity was also  
7 measured in human PBMC via flow cytometry.

8

## 9 **Statistics**

10           Each experiment was run in triplicate with at least three independent trials. Statistical analysis  
11 was performed using GraphPad Prism (GraphPad Software) or SAS 9.2 (SAS Institute). Statistical  
12 significance between mean values was determined using the Student's *t* test or one-way ANOVA with *P*  
13  $< 0.05$  considered as significantly different.

14

## 1 RESULTS

### 2 CD8<sup>+</sup> T cells in NOD-*Ncf1<sup>m1J</sup>* Mice Exhibit a Reduced Production of Pro-inflammatory Cytokines 3 and Effector Molecules

4 NOX2 functions in TCR signaling upon CD3 and CD28 cross-linking (8) (37), and ROS is  
5 produced during CD8<sup>+</sup> T cell activation (38). ROS production by CD8<sup>+</sup> T cells from NOD and  
6 NOD-*Ncf1<sup>m1J</sup>* mice was examined using the immuno-spin trap DMPO after stimulation with  $\alpha$ -CD3 and  
7  $\alpha$ -CD28. Similar to our previous report (8), NOD-*Ncf1<sup>m1J</sup>* CD8<sup>+</sup> T cells exhibited significantly less ROS  
8 production after stimulation when compared to CD8<sup>+</sup> T cells from NOD mice (Supplemental Figure 1).

9 Earlier studies led us to hypothesize that NOX2-deficient NOD-*Ncf1<sup>m1J</sup>* CD8<sup>+</sup> T cells would  
10 exhibit defective effector function *in vitro* (8). Stimulation of NOD-*Ncf1<sup>m1J</sup>* CD8<sup>+</sup> T cells with  $\alpha$ -CD3  
11 and  $\alpha$ -CD28 elicited a significant reduction in IFN $\gamma$  production, which was consistent with our previous  
12 report that NOD-*Ncf1<sup>m1J</sup>* CD4<sup>+</sup> T cells have decreased T<sub>H</sub>1 responses (11). TNF $\alpha$  and granzyme B were  
13 also reduced in the NOD-*Ncf1<sup>m1J</sup>* CD8<sup>+</sup> T cells after  $\alpha$ -CD3 and  $\alpha$ -CD28 stimulation (Figure 1A). In  
14 addition, quantitative real-time PCR (qRT-PCR) was carried out with  $\alpha$ -CD3/ $\alpha$ -CD28 stimulated CTL.  
15 IFN $\gamma$  and granzyme B transcripts were significantly reduced in NOD-*Ncf1<sup>m1J</sup>* CD8<sup>+</sup> T cells (Figure 1B).  
16 No significant differences between NOD and NOD-*Ncf1<sup>m1J</sup>* CD8<sup>+</sup> T cells were observed in the mRNA  
17 level of IL-2, IL-4, perforin, LAMP-1, TGF $\beta$  or FasL (Figure 1B). This indicated that a functional  
18 NOX2 is essential for the production of specific pro-inflammatory cytokines (IFN $\gamma$ ) and specific  
19 cytotoxic molecules (granzyme B). In accord with similar IL-2 transcription (Figure 1B), CD8<sup>+</sup> T cell  
20 proliferation was equal in cells with and without NOX2 activity (Figure 1C). Differences in activation  
21 status, measured as CD8<sup>+</sup>CD62L<sup>-</sup>CD69<sup>+</sup> cells (not shown), or apoptosis (Figure 1D) were not observed  
22 when comparing  $\alpha$ -CD3 and  $\alpha$ -CD28 stimulated NOD and NOD-*Ncf1<sup>m1J</sup>* CD8<sup>+</sup> T cells. These data  
23 indicate the loss of ROS production in CTL resulted in a selective deficiency in a Tc1 effector  
24 phenotype.

1 In an effort to understand the mechanism behind the selective loss of IFN $\gamma$  and granzyme B, we  
2 sought to investigate the canonical transcription factor of the Tc1 cell lineage, Tbet (39-41). Intracellular  
3 staining showed that Tbet levels were decreased in activated NOD-*Ncf1*<sup>m1J</sup> CD8<sup>+</sup> T cells compared to  
4 wild type controls, (Figure 1E). The other transcriptional factor related to IFN $\gamma$  and granzyme B  
5 production, Eomesodermin (Eomes) (39), was present at equal levels in activated NOD and NOD-  
6 *Ncf1*<sup>m1J</sup> CD8<sup>+</sup> T cells (Figure 1F). These results suggest that ROS potentiates Tbet expression to  
7 promote CD8<sup>+</sup> T cell effector function.

8

## 9 **The NOX2 Inhibitor, Apocynin, Suppresses the Production of Effector Molecules in Mouse CD8<sup>+</sup>**

### 10 **T Cells**

11 Production of ROS by NOX2 can be suppressed by apocynin, a specific inhibitor of p47<sup>phox</sup>, the  
12 gene product of *Ncf1* (42). Apocynin did not alter CD8<sup>+</sup> T cell viability (Supplemental Fig 2A) but did  
13 inhibit IFN $\gamma$  production in a dose dependent manner (Supplemental Fig 2B), with 200 $\mu$ M exhibiting  
14 maximal effects. To confirm the role of NOX2 in CTL effector function, splenic CD8<sup>+</sup> T cells were  
15 stimulated for 72 hrs with plate-bound  $\alpha$ -CD3 and  $\alpha$ -CD28 in the presence or absence of 200 $\mu$ M  
16 apocynin. Consistent with the observations in NOD-*Ncf1*<sup>m1J</sup>, apocynin dramatically suppressed  
17 production of granzyme B, IFN $\gamma$ , and TNF $\alpha$  protein levels (Figure 2A) and corresponding mRNA  
18 transcripts (Figure 2B). Apocynin treated NOD CD8<sup>+</sup> T cells showed a 30% reduction in intracellular T-  
19 bet after  $\alpha$ -CD3 and  $\alpha$ -CD28 stimulation (Figure 2C). which was similar to results with NOD-*Ncf1*<sup>m1J</sup>  
20 CD8<sup>+</sup> T cells (Figure 1E), apocynin had no impact on proliferation (Figure 2D).

21 To confirm that NOX2 activity during CTL activation was not restricted to the autoimmune-  
22 prone NOD mouse, purified splenic CD8<sup>+</sup> T cells from C57BL/6 (B6) mice were stimulated with  $\alpha$ -CD3  
23 and  $\alpha$ -CD28 with or without apocynin. Tbet, IFN $\gamma$ , and granzyme B were assessed by intracellular  
24 staining. The percentage of cells positive for the transcription factor Tbet (40.9  $\pm$  2 (B6) vs. 18.8  $\pm$  2.1

1 (B6+apocynin);  $p < 0.0001$ ) as well as IFN $\gamma$  ( $49.2 \pm 4.4$  (B6) vs.  $28.9 \pm 1.9$  (B6+apocynin);  $p = 0.0027$ )  
2 and granzyme B ( $50.3 \pm 6.6$  (B6) vs.  $23.2 \pm 3.7$  (B6+apocynin);  $p = 0.0027$ ) were all reduced in B6 CTL  
3 when activated in the presence of apocynin. This phenotype was similar to what was observed in NOD  
4 CD8<sup>+</sup> T cells (Figures 1 and 2). Similarly, B6 cells treated with and without apocynin had comparable  
5 upregulation of CD69 and similar levels of proliferation.

6

### 7 **Inhibition of NOX2 Blocks Cytolytic Capacity During Antigen-specific Activation of CTLs.**

8 To determine how the loss of NOX2 derived ROS production impacts antigen-specific CTL  
9 activation, we used CD8<sup>+</sup> T cells from the highly pathogenic AI4 TCR-transgenic NOD mouse  
10 (NOD.AI4 $\alpha/\beta$ -*Rag1*<sup>-/-</sup>) (35). Upon antigen-specific activation of AI4 cells a stark reduction in the  
11 intracellular staining of IFN $\gamma$ , granzyme B, and T-bet, and perforin occurred when NOX2 was inhibited  
12 by apocynin (Figure 2E).

13 An intact *Ncf1* in CD8<sup>+</sup> T cells was critical for efficient adoptive transfer of T1D (8) and the loss  
14 of NOX2 activity resulted in reduced CD8<sup>+</sup> T cell cytokine and effector molecule production (Figures 1-  
15 2). Thus, we hypothesized that NOX2 activity is essential for cytolytic activity of CD8<sup>+</sup> T cells. AI4  
16 effector cells were activated by the specific mimotope for 72 hours (activation phase) prior to use in the  
17 cell-mediated lymphocytotoxicity (CML) assay (effector phase) using the NOD-derived NIT-1 pancreatic  
18  $\beta$  cell line as a target (35). As expected, AI4 cells that were not exposed to apocynin during either the  
19 activation or effector phases effectively lysed NIT-1 cells (Figure 2F, 1<sup>st</sup> bar).  $\beta$  cell killing was  
20 prevented when AI4 T cells were treated with apocynin during only the activation phase (Figure 2F, 2<sup>nd</sup>  
21 Bar). In stark contrast, the addition of apocynin during only the CML assay did not affect cytotoxic  
22 capability (Figure 2F, 3<sup>rd</sup> bar). Finally, apocynin treatment of AI4 T cells during both phases  
23 significantly reduced lysis. NOX2 is vital for diabetogenic T cell mediated  $\beta$  cell killing and oxidants

1 produced by this enzyme are important during activation/differentiation and likely involved in proximal  
2 TCR signaling.

3

#### 4 **NOX2 Regulates T-bet, IFN $\gamma$ , Granzyme B and Effector Function of Human CD8<sup>+</sup> T Cells.**

5 Similar to mouse CD8<sup>+</sup> T cells, apocynin reduced IFN $\gamma$  production from human CD8<sup>+</sup> T cells in  
6 a dose dependent manner with 200 $\mu$ M apocynin providing maximal effects (Supplemental Figure 2C).  
7 The inhibition of NOX2 in human CD8<sup>+</sup> T cells with 200 $\mu$ M apocynin led to a significant increase in  
8 proliferation (Figure 3A). Whereas proliferation was enhanced in the presence of apocynin, inhibition of  
9 NOX2 by apocynin during  $\alpha$ -CD3 and  $\alpha$ -CD28 activation blunted production of IFN $\gamma$ , granzyme B, and  
10 T-bet (Figures 3B-3D), similar to results with CD8<sup>+</sup> T cells from NOD and B6 mice. An *in vitro* model  
11 of antigen-specific target cell killing was used to determine the impact of NOX2 inhibition on CD8<sup>+</sup>  
12 cytolytic function (Figure 3E). When apocynin (200 $\mu$ M) was absent from both the activation and  
13 effector phases, the CTL efficiently lysed the BL5 cells (Figure 3E, open bar). However, when apocynin  
14 was added during the activation phase, lysis of BL5 cells fell to less than 10% (Figure 3E, checkered  
15 bar). Inhibition of NOX2 during only the effector phase led to a mild reduction in lysis (Figure 3E,  
16 hatched bar). Apocynin during both the activation and effector phases resulted in an almost complete  
17 inhibition of lysis (Figure 3E, filled bar), comparable to that observed when NOX2 was inhibited during  
18 the activation phase alone. These results are similar to the observations using mouse CD8<sup>+</sup> T cells,  
19 where inhibition of NOX2 during CTL activation led to a reduction in T-bet and effector  
20 cytokines/molecules with almost complete ablation of cytolytic activity without blunting proliferation.  
21 Therefore, NOX2 activity is essential for human and mouse CTL effector function.

22

#### 23 **H<sub>2</sub>O<sub>2</sub>, but Not Superoxide, Promotes CD8<sup>+</sup> T Cell Function**



1 NOX2 produces superoxide as a direct product(9). *In vivo*, superoxide is dismutated to H<sub>2</sub>O<sub>2</sub> by  
2 superoxide dismutase (SOD) family members. H<sub>2</sub>O<sub>2</sub> can be subsequently catalyzed into H<sub>2</sub>O by catalase  
3 (43, 44). Superoxide can travel through the membrane via Chloride Voltage-Gated Channel 3 (ClC-3)  
4 and H<sub>2</sub>O<sub>2</sub> crosses the membrane into the cytosol via aquaporin or diffusion (6, 45). The type of oxidant  
5 that modulates the effect of NOX2 in CD8<sup>+</sup> T cells was examined. Purified NOD CD8<sup>+</sup> T cells were  
6 treated with or without SOD1 and stimulated with  $\alpha$ -CD3 and  $\alpha$ -CD28 conjugated beads. SOD1 had  
7 little impact on the synthesis or secretion of IFN $\gamma$  (Figures 4A-4B). In addition, SOD1 had no effect on  
8 synthesis of granzyme B or TNF $\alpha$  (Figure 4A). Accordingly, SOD1 treatment had no effect on T-bet  
9 (Figure 4C).

10 To examine the effect of H<sub>2</sub>O<sub>2</sub>, purified NOD CD8<sup>+</sup> T cells were treated with or without catalase  
11 and stimulated with  $\alpha$ -CD3 and  $\alpha$ -CD28. Catalase treatment significantly suppressed production of  
12 IFN $\gamma$ , granzyme B and TNF $\alpha$  (Figures 4A and 4B). Furthermore, T-bet expression after  $\alpha$ -CD3 and  $\alpha$ -  
13 CD28 stimulation also was significantly reduced following catalase treatment (Figure 4C). Therefore,  
14 H<sub>2</sub>O<sub>2</sub> transmits the redox signal to promote T-bet expression and effector function in CD8<sup>+</sup> T cells.  
15 Interestingly, unlike NOD-*Ncf1<sup>m1J</sup>* or apocynin-treated cells, CD8<sup>+</sup> T cell proliferation was dramatically  
16 suppressed by scavenging H<sub>2</sub>O<sub>2</sub> (Figure 4D). This is consistent with role for a NOX2-independent ROS  
17 source, such as mitochondrial ROS, in IL-2 production and CD8<sup>+</sup> T cell proliferation (46). Indeed,  
18 addition of IL-2 to the catalase treated CTL partially rescued cell proliferation (Figure 4E).

19 To determine if the defective effector functions associated with loss of NOX2 activity persist  
20 when proximal signaling events are bypassed, NOD and NOD-*Ncf1<sup>m1J</sup>* CD8<sup>+</sup> T cells were activated with  
21 PMA and ionomycin (47). When NOD-*Ncf1<sup>m1J</sup>* CD8<sup>+</sup> T cells were activated by PMA and ionomycin,  
22 protein levels of IFN $\gamma$ , granzyme B and T-bet were equal to NOX2-intact NOD CD8<sup>+</sup> T cells  
23 (Supplemental Figure 3A). Similarly, catalase treatment did not impact CD8<sup>+</sup> T cells activated with  
24 PMA/ionomycin (Supplemental Figure 3B). Therefore, NOX2-derived H<sub>2</sub>O<sub>2</sub> acts proximally but not  
25 distally in TCR signaling.

1

## 2 **NOX2 Activity Impacts TCR signaling at the TSC1/2 Complex to Promote mTORc1 Activity**

3 Proximal TCR signaling events include activation of AKT by PI3K and subsequent repression of  
4 the TSC1/2 complex (38). The inactivation of TSC1/2 results in elevated RheB-GTP levels that can  
5 promote mammalian target of rapamycin complex 1 (mTORc1) activity leading to downstream effects  
6 on T-bet, IFN $\gamma$ , and granzyme B (5). The AKT pathway was not altered, as lysates of  $\alpha$ -CD3 and  $\alpha$ -  
7 CD28-stimulated NOD and NOD-*Ncf1<sup>m1J</sup>* CTLs displayed comparable p-GSK levels (Figure 5A).  
8 However, differences in TSC1/2 activity were observed, as RheB-GTP increased ~2-fold after activation  
9 in NOD CTL, whereas an increase in RheB-GTP was not observed in NOD-*Ncf1<sup>m1J</sup>* CTL (Figure 5B).

10 mTORc1 is essential for CD8<sup>+</sup> T cell effector function through promoting T-bet expression (5).  
11 In fibroblasts, mTORc1 activity can be promoted by oxidants through a process that is dependent on  
12 oxidation and repression of TSC1/2 function (48). We therefore hypothesized that NOX2-derived ROS  
13 may enhance CTL effector function by promoting mTORc1, an upstream mediator of T-bet. mTORc1  
14 phosphorylates S6K at T389 (p-S6K) and can be used as an indicator of mTORc1 activity (48, 49).  
15 Purified CTLs from NOD mice exhibited a significant increase in p-S6K upon TCR activation,  
16 indicating sufficient mTORc1 activity after stimulation. Meanwhile, S6K phosphorylation was  
17 significantly lower in activated NOD-*Ncf1<sup>m1J</sup>* CD8<sup>+</sup> T cells (Figure 5C). This was further confirmed  
18 through inhibition of NOX2 by apocynin leading to lower p-S6K in antigen-specific activation of mouse  
19 AI4 CD8<sup>+</sup> T cells (Figure 5D). In addition, we were able to show the same effect of apocynin in human  
20 CD8<sup>+</sup> T cells. Lack of NOX2 function inhibited activation-induced P-S6 (Figure 5E) but not p-AKT  
21 (Figure 5F) in human CD8<sup>+</sup> T cells. These data support the hypothesis that a functional NOX2  
22 inactivates TSC1/2 resulting in downstream TCR-dependent RHEB-GTP and mTORc1 activation in  
23 both mouse and human CD8<sup>+</sup> T cells.

1 To confirm that mTORc1 was required for CD8<sup>+</sup> T cell effector function, we treated CTL with  
2 the mTORc1 inhibitor rapamycin and activated the cells with  $\alpha$ -CD3 and  $\alpha$ -CD28. Inhibition of  
3 mTORc1 dramatically reduced IFN $\gamma$ , granzyme B, and TNF $\alpha$  production in CD8<sup>+</sup> T cells (Figure 6A).  
4 Suppression was observed as early as 24 hours after stimulation, indicating that inhibition of mTORc1  
5 interrupts early events during CTL activation (Figure 6B). Consistent with a previous report (5), the  
6 compromised effector function results from a reduction in T-bet production after activation of rapamycin  
7 treated CD8<sup>+</sup> T cells (Figure 6C).

8

### 9 **Redox Regulation of mTORc1 Activity in CD8<sup>+</sup> T cell**

10 The compromised mTORc1 activity in NOD-*Ncf1*<sup>m1J</sup> (Figure 5C) led us to propose that mTORc1  
11 activity in NOD CD8<sup>+</sup> T cells is redox-dependent. To explore this possibility, the effect of oxidants or  
12 antioxidants upon mTORc1 activation was assessed. Phenylarsine oxide (PAO) is a cell permeable  
13 reagent that cross-links vicinal thiol groups and thus, was used as a cysteine oxidant. BAL was used as a  
14 reducing reagent. According to previous reports, PAO is able to significantly promote the  
15 phosphorylation of S6K by mTORc1 in HEK293T cells, while BAL blocks the PAO-induced or  
16 endogenous oxidant mediated mTORc1 activation in these cells (48, 50). NOD CD8<sup>+</sup> T cells were  
17 treated with either PAO or BAL in the presence or absence of  $\alpha$ -CD3 and  $\alpha$ -CD28 for 45 minutes. In the  
18 absence of TCR activation, phosphorylation of S6K was increased by PAO (Figure 6D). When CTL  
19 were treated with BAL, p-S6K was dramatically decreased to basal levels even in the presence of  $\alpha$ -CD3  
20 and  $\alpha$ -CD28 stimulation (Figure 6D). This confirmed the positive effect of oxidants on mTORc1 in  
21 CD8<sup>+</sup> T cells. As our data demonstrates that H<sub>2</sub>O<sub>2</sub> could be the effector molecule of NOX2 to elicit the  
22 redox signal in T cell activation, we tested the ability of H<sub>2</sub>O<sub>2</sub> to promote mTORc1 activity in CD8<sup>+</sup> T  
23 cells. NOD CTL were treated with 10 $\mu$ M H<sub>2</sub>O<sub>2</sub> and then activated with  $\alpha$ -CD3 and  $\alpha$ -CD28. Similar to  
24 the PAO treatment of resting CD8<sup>+</sup> T cells, H<sub>2</sub>O<sub>2</sub> promoted phosphorylation of S6K even in the absence

1 of polyclonal stimulation. However, such a low dose of H<sub>2</sub>O<sub>2</sub> did not potentiate mTORc1 activity during  
2 polyclonal activation of T cells. A plausible explanation was that this resulted from redundant ROS  
3 produced in NOX2-intact CTL after TCR engagement (Figure 6E). To confirm NOX2 as the H<sub>2</sub>O<sub>2</sub>  
4 source, CTL were treated with apocynin and S6K phosphorylation was assessed with or without  $\alpha$ -CD3  
5 and  $\alpha$ -CD28 stimulation. Consistent with NOD-*Ncf1*<sup>m1J</sup> CD8<sup>+</sup> T cells, when NOX2-intact CTL were  
6 activated in the presence of apocynin, p-S6K levels were significantly reduced (Figure 6E). Taken  
7 together, these data demonstrate that NOX2-derived H<sub>2</sub>O<sub>2</sub> by CD8<sup>+</sup> T cells can mediate TCR signaling  
8 through mTORc1 via TSC1/2 as shown in our proposed model (Figure 7).

9

## 1 DISCUSSION

2 During the interaction of naïve T cells with antigen-presenting cells, TCR signaling is  
3 coordinated with secondary and tertiary signals to decide T cell fate and differentiation (51). Previous  
4 studies have demonstrated that ROS govern processes of T cell activation, including IL-2 production,  
5 proliferation, differentiation, and effector function (7, 11, 52-55). In T cells, various ROS generators  
6 collaboratively promote cell activation and govern effector phenotypes (46, 54). Here, we have  
7 identified that another ROS generator, NOX2, is vital for CD8<sup>+</sup> T cell activation by promoting effector  
8 function and cytotoxicity through the mTORC1/T-bet axis signaling pathway (Figure 7).

9 T1D is primarily mediated by autoreactive T cell responses. Both clinical and basic science  
10 reports have provided evidence that support a role for ROS in the pathogenesis of T1D (56). CD8<sup>+</sup> T  
11 cells are recognized as a major effector cell type in mediating  $\beta$  cell death in T1D (22, 57, 58). Multiple  
12 reports suggest that the transcriptional factor T-bet is required in the development of T1D by promoting  
13 CTL effector differentiation (59-61). Our previous studies have indicated that NOX2 promotes T<sub>H</sub>1  
14 differentiation via T-bet in NOD CD4<sup>+</sup> T cells (11) and is required for full effector function of CD8<sup>+</sup> T  
15 cells in T1D using both NOD-*Ncf1*<sup>m1J</sup> as well as adoptive transfer models. Here, we have discovered a  
16 novel mechanism where NOX2-derived ROS promotes CTL effector function through enhancing T-bet  
17 expression. Stimulated-NOD-*Ncf1*<sup>m1J</sup> CTL showed a reduction in T-bet expression and suppression of  
18 CTL effector responses including IFN $\gamma$ , granzyme B, and TNF $\alpha$  production. Similarly, when treated  
19 with the NOX2 inhibitor apocynin, polyclonal activation of CD8 T cells from the NOD and B6 strains  
20 showed a decline in T-bet synthesis. These results were extended to human model systems where  
21 inhibition of NOX2 during activation prevents T-bet, IFN $\gamma$ , and granzyme B expression and effector  
22 function of both human and mouse CTL.

23 The treatment of diabetogenic AI4 CTL with apocynin during antigen-specific activation resulted  
24 in an ablation of T-bet, IFN $\gamma$ , and granzyme B as well as  $\beta$  cell-cytolytic capability. In contrast, if

1 NOX2 was only inhibited during the CML assay, the lysis of  $\beta$  cells was equal to untreated AI4 CTL,  
2 suggesting that the effect of NOX2 is early during CTL activation and is not required for CTL  
3 degranulation. These results were confirmed in a human model effector:target co-culture system. When  
4 NOX2 was blocked by apocynin during the activation phase, IGRP-reactive human CTL-avatars could  
5 not lyse human  $\beta$  cells. The fact that specific lysis of  $\beta$  cells was not impacted or only minimally  
6 affected by addition of apocynin during the effector phase of the CML assay supports the notion that  
7 blocking NOX2 activity within the  $\beta$  cell would not provide significant protection of the beta cells from  
8 lysis by CTL. The results corroborate our previous studies where NOD-*Ncf1<sup>m1J</sup>* mice were susceptible to  
9 adoptive transfer of AI4 CTL (8). These data highlight an important role for NOX2 in promoting CTL  
10 effector function during the early events of activation. CTL proliferation was not impacted when NOX2  
11 was inactive due to genetic ablation or pharmacological inhibition, which is consistent with a previous  
12 report on the proliferative capacity of T-bet knock-out CTL (60).

13 NOX2 generates superoxide at the exterior side of the cell membrane (9, 10). Superoxide is  
14 thought to be transported across membranes by ClC-3, a member of the ClC voltage-gated chloride (Cl<sup>-</sup>)  
15 channel superfamily. Alternatively, it could be converted into H<sub>2</sub>O<sub>2</sub> outside of CTL that can then diffuse  
16 into the cytosol or be transported by aquaporins (45, 62, 63). Scavenging superoxide by treating CTL  
17 with SOD1 during polyclonal activation had little effect on proliferation or expression of T-bet, IFN $\gamma$ ,  
18 granzyme B or TNF $\alpha$ ; however, scavenging H<sub>2</sub>O<sub>2</sub> resulted in significant decreases of these CTL effector  
19 molecules. This indicates H<sub>2</sub>O<sub>2</sub> instead of superoxide modulates CTL effector functions. CTL  
20 proliferation also was dramatically suppressed by catalase treatment, suggesting a NOX2-independent  
21 source of ROS was functioning to promote CTL proliferation. As mitochondrial ROS promotes T cell  
22 proliferation by enhancing IL-2 production (46), we conclude that in CTL, NOX2 and mitochondrial-  
23 derived H<sub>2</sub>O<sub>2</sub> enhance T cell activation by promoting effector differentiation and proliferation,  
24 respectively. Indeed, when IL-2 was added to the cultures during CTL activation with  $\alpha$ -CD3/ $\alpha$ -CD28 in  
25 the presence of catalase, proliferation was restored.

1 NOX2 promotes T-bet production through modulating mTORc1 activity after  $\alpha$ -CD3 and  $\alpha$ -  
2 CD28 stimulation of naïve CD8<sup>+</sup> T cells. mTORc1 promotes the production of T-bet over its counterpart  
3 Eomesodermin after CTL activation, to regulate the balance between CTL effector and memory  
4 differentiation (5). Inhibition of mTORc1 with rapamycin had a dramatic suppressive effect on NOD  
5 CTL T-bet production, pro-inflammatory cytokine, and effector molecule expression, but with little  
6 impact on cell proliferation. CTLs with *Nefl* mutation or inhibition were compromised in TCR-  
7 dependent mTORc1 activation. Our results provide additional data to add to a more complete picture of  
8 mTORc1 activation and induction of differentiation in CD8<sup>+</sup> T cells (64-68) to include NOX2-derived  
9 hydrogen peroxide as an upstream mediator of mTOR.

10 Hydrogen peroxide derived from NOX2 promotes CTL effector function. Hydrogen peroxide  
11 treatment of CTL activated mTORc1; however, when NOX2 produced enough free radicals upon  $\alpha$ -CD3  
12 and  $\alpha$ -CD28 stimulation, H<sub>2</sub>O<sub>2</sub> could not further promote mTORc1 activation. Treating NOD CTL with  
13 cysteine specific oxidant, PAO, greatly enhanced mTORc1 activity, even without the CD3/CD28 signal.  
14 In contrast, the antioxidant BAL inhibited the activation of this complex in CTL, confirming the  
15 significance of ROS in mTORc1 activation. mTORc1 activation is involved in multiple cellular  
16 pathways and RheB-GTP, the active GTP bound form of RheB, is a major activator of mTORc1 by  
17 direct interaction (69, 70). In many cell types, RheB-GTP is negatively regulated by TSC1/2 by  
18 transforming RheB-GTP into Rheb-GDP, the inactive form (71). Our data demonstrate that in the  
19 absence of NOX2-derived ROS, RheB-GTP levels are not suppressed indicating compromised TSC1/2  
20 activity (Figure 5B). Akt function was not impaired in the absence of NOX2, demonstrating that NOX2  
21 regulates TSC1/2 activity in CTL in an Akt-independent manner, as previously described using  
22 immortalized cell lines (48).

23 In summary, this study provides a novel mechanism whereby oxidants regulate CD8<sup>+</sup> T cell  
24 effector function. NOX2-derived H<sub>2</sub>O<sub>2</sub> enhances Rheb activity and thus promotes mTORc1 function  
25 during CTL activation, leading to an activation of T-bet as well as downstream CTL effector function

1 and cytolytic activity. The data reported here do not support a global pro-inflammatory dysfunction in  
2 NOX-deficient animals. *Ncf1* mutations previously have been associated with increased severity of  
3 experimental allergic encephalomyelitis and collagen-induced arthritis (11, 72) yet resistance to T1D (8,  
4 11, 25). Due to the essential role of CD8<sup>+</sup> T cells in T1D NOX2-derived ROS play CTL extrinsic and  
5 intrinsic roles in pathogenesis. NOX2 promotes dendritic cell antigen cross presentation and activation  
6 of naive CTL in T1D (extrinsic (25)) and here we provide evidence for a CTL intrinsic role of NOX2 in  
7 regulating signal transduction leading to production of effector molecules and cytolytic function  
8 (Figures 1-4 and 7). Our data provide new insights into potential targets for therapeutic strategies in  
9 organ transplantation or CTL-mediated autoimmune disease, such as T1D. In addition, due to the  
10 essential role of ROS in immune cell signal transduction, we predict that non-targeted antioxidant  
11 therapy or supplements might alter the thresholds for CTL effector function during immune responses.

12



1 **ACKNOWLEDGEMENTS**

2 This work was supported by research grants from the JDRF, the National Institutes of Health R01  
3 DK074656 (C.E.M.), UC4 DK104194 (C.E.M.), P01 AI042288 (C.E.M./T.M.B), F30 DK105788  
4 (B.N.N.), Horizon Therapeutics (J.W.L.) and the Sebastian Family Endowment for Diabetes Research.

5 The authors declare that no conflicts of interest exist.

6

7 **Author Contributions**

8 JC researched the data and wrote the manuscript, CL researched the data and wrote the manuscript,  
9 AVC researched the data and reviewed/edited the manuscript, BNN researched the data and  
10 reviewed/edited the manuscript, TMB provided key resources, contributed to discussion, and  
11 reviewed/edited the manuscript, YX researched the data and reviewed/edited the manuscript, NM  
12 researched the data and reviewed/edited the manuscript, CS researched the data and reviewed/edited the  
13 manuscript, WHR contributed to discussion and reviewed/edited the manuscript, HMT conceived of  
14 study components and reviewed/edited the manuscript, JWL researched the data and reviewed/edited the  
15 manuscript, and CEM conceived of the study, oversaw all aspects of the research, and wrote the  
16 manuscript.

17

## 1 Figure Legends

2

3 Figure 1. NOD-*Ncf1<sup>m1J</sup>* CD8<sup>+</sup> T cells exhibit a decrease in pro-inflammatory cytokine and effector  
4 molecule production. (A) Representative histogram and the quantitation of intracellular  
5 staining in purified CD8<sup>+</sup> T cells after stimulation of NOD (red histogram or open bar) or  
6 NOD-*Ncf1<sup>m1J</sup>* (blue histogram or black bar) with  $\alpha$ -CD3/ $\alpha$ -CD28 Abs for 72 hours. Gray  
7 histogram represents the isotype control. Twelve mice were included in each group. (B) Real-  
8 time quantitative PCR of cytokine and effector molecule mRNA in CD8<sup>+</sup> T cells after  $\alpha$ -  
9 CD3/ $\alpha$ -CD28 stimulation of NOD (open bar) or NOD-*Ncf1<sup>m1J</sup>* (black bar) for 48 hours. PCR  
10 was performed with pooled cDNA from three mice and results are representative of three se  
11 AI4 splenocytes?independent experiments performed in triplicate. (C) Proliferation was  
12 assessed by <sup>3</sup>H-TdR incorporation using CD8<sup>+</sup> T cells activated with  $\alpha$ -CD3/ $\alpha$ -CD28 for 72  
13 hours. D) CTL apoptosis 72 hours after  $\alpha$ -CD3/ $\alpha$ -CD28 activation. (E) Representative dot-  
14 plot and the quantitation of intracellular staining of T-bet in purified CD8<sup>+</sup> T cells after  $\alpha$ -  
15 CD3/ $\alpha$ -CD28 stimulation for 72 hours. (F) Immunoblot of Eomes in CD8<sup>+</sup> T cells after  
16 stimulation with  $\alpha$ CD3/ $\alpha$ CD28 for 72 hours. Four mice were included in each group. Data in  
17 the bar graphs are represented as mean  $\pm$  SEM. Statistical analysis used Student's t test (N.S.  
18  $P > 0.05$ ; \*  $P < 0.05$ ; \*\*  $P < 0.01$ ; \*\*\*  $P < 0.001$ .

19

20 Figure 2. NOX2 is essential for effector function and cytolytic activity of CTL. A-D: CD8<sup>+</sup> T cells from  
21 NOD spleens were activated with plate-bound  $\alpha$ -CD3/  $\alpha$ -CD28 with or without the presence  
22 of apocynin 200mM. (A) Quantitation of intracellular staining for IFN $\gamma$ , Granzyme B and  
23 TNF $\alpha$ . (B) Real-time quantitative PCR for IFN $\gamma$ , Granzyme B and TNF $\alpha$ . cDNA was pooled  
24 from at least three mice and results represent three independent experiments done in

1 triplicate. (C) Quantitation of intracellular staining of T-bet in NOD CD8<sup>+</sup> T cells. (D)  
2 Proliferation of NOD CD8<sup>+</sup> T cells. (E) Intracellular staining and quantitative analysis of  
3 IFN $\gamma$ , granzyme B, T-bet, and Perforin expression in autoreactive, monoclonal AI4 CTL after  
4 stimulation by specific mimotope for 72 hours either without (open bars) or with (black bars)  
5 apocynin (200 $\mu$ M). Gated on Live/Dead\_NIR-CD3<sup>+</sup>CD8<sup>+</sup>. (F) AI4-induced CML is  
6 significantly reduced when NOX2 was inhibited during T cell activation but not during the  
7 effector phase. AI4 T cells were activated by antigen with (CTL Activation phase (+)) or  
8 without (CTL Activation phase (-)) apocynin. <sup>51</sup>Cr labeled NIT-1 NOD-derived beta cells  
9 were seeded in 96-well culture plates and cultured with preactivated AI4 cells at an E:T ratio  
10 of 20:1 for 16 h, with apocynin (Effector phase (+)) or without apocynin (Effector phase (-)).  
11 Data in the bar graphs are represented as mean  $\pm$  SEM. Statistical analysis used Student's t  
12 test (\*  $P < 0.05$ ; \*\*  $P < 0.01$ ; \*\*\*  $P < 0.001$ ). Columns with different letters are statistically  
13 different at a level  $\leq 0.05$ .

14  
15 Figure 3. NOX2 is essential for effector function of human CD8<sup>+</sup> T cells. Purified naïve CD8<sup>+</sup> T cells  
16 from healthy volunteers were activated with  $\alpha$ CD3 and  $\alpha$ CD28 in the presence or absence of  
17 200 $\mu$ M apocynin. (A) Proliferation was assessed by <sup>3</sup>H-TdR incorporation at 72 hours.  
18 Quantitation of intracellular staining for (B) IFN $\gamma$ , (C) Granzyme B, and (D) T-bet in purified  
19 CD8<sup>+</sup> T cells ( $5 \times 10^5$  cells) after  $\alpha$ CD3 and  $\alpha$ CD28 stimulation for 72 hours with or without  
20 200 $\mu$ M apocynin. (E) Purified naïve human CD8<sup>+</sup> T cells were activated in the presence or  
21 absence of 200 $\mu$ M Apocynin for 48 hours, transduced with a lentivirus encoding an IGRP-  
22 TCR, and then expanded for an additional 7 days in IL-2 (20U/mL) with  $\alpha$ CD3/ $\alpha$ CD28  
23 Dynabeads. Apocynin (200 $\mu$ M) was present in specific cultures during the entire CTL  
24 activation phase (CTL Activation Phase +). Additionally, CTL were activated in the absence

1 of apocynin (CTL Activation Phase -). The CTL effector phase was performed by co-  
2 culturing IGRP reactive CTL at an E:T ratio of 25:1, with 200 $\mu$ M apocynin (CTL Effector  
3 Phase +) or without (CTL Effector Phase -). Data represented as mean  $\pm$  SEM. Statistical  
4 analysis used Student's t test (\*\*\*)  $P < 0.001$ ). In E bars with different letters are statistically  
5 different at a level  $p < 0.05$ .

6

7 Figure 4. Hydrogen Peroxide scavenging significantly blunts CTL effector function after  $\alpha$ CD3/ $\alpha$ CD28  
8 stimulation. CTL were stimulated by  $\alpha$ CD3/ $\alpha$ CD28 for 3 days in the presence or absence of  
9 catalase or SOD1. (A) Intracellular levels of IFN $\gamma$ , granzyme B and TNF $\alpha$  were assessed.  
10 (B) IFN $\gamma$  was measured by ELISA on days 1, 2 and 3. (C) Intracellular staining for T-bet in  
11 CTL. (D) CTL proliferation was assessed by [ $^3$ H]TdR incorporation. (E) CTL proliferation  
12 was measured at 72 hours after  $\alpha$ CD3/ $\alpha$ CD28 stimulation in the presence of catalase and IL2.  
13 Results are presented as mean  $\pm$  SEM. Each measure was compiled from four independent  
14 observations performed in triplicate. (\*  $P < 0.05$ ; \*\*  $P < 0.01$ ; \*\*\*  $P < 0.001$ ).

15

16 Figure 5. NOX2 activity is required for TSC1/2 repression and downstream mTORc1 activation during  
17 CTL activation. NOD or NOD-*Ncf1*<sup>m1J</sup> CD8<sup>+</sup> T cells were activated by  $\alpha$ -CD3/ $\alpha$ -CD28 for  
18 30 minutes and subjected to immunoprecipitation of p-GSK and RheB-GTP. (A) Cellular p-  
19 GSK levels, a marker of Akt kinase activity, were determined relative to the input control  
20 Erk1/2. (B) Cellular level of RheB-GTP was determined by calculating the ratio of  
21 immunoprecipitated RheB-GTP and input control Erk1/2. Untreated NOD CTL was used as  
22 the reference group for normalization between different tests. (C) Immunoblot showing a  
23 compromised mTOR complex activity in CTL from NOD-*Ncf1*<sup>m1J</sup>. NOD or NOD-*Ncf1*<sup>m1J</sup>.

1 CD8<sup>+</sup> T cells were activated by  $\alpha$ -CD3/ $\alpha$ -CD28 for 30 minutes with the presence or absence  
2 of 20ng/mL rapamycin. Phosphorylation of S6K was measured by the ratio of  
3 phosphorylated S6K and total S6K. Untreated NOD CTL was used as the reference group  
4 for normalization among multiple tests. (D) Intracellular staining and quantitative analysis of  
5 pS6K in autoreactive, monoclonal AI4 CTL after stimulation by specific mimotope for 72  
6 hours either without (open bars) or with (black bars) apocynin (200 $\mu$ M). Gated on  
7 Live/Dead<sub>NIR</sub>-CD3<sup>+</sup>CD8<sup>+</sup>. (E-F) Human PBMC from healthy donors (n=6) with or  
8 without pretreatment of apocynin (400  $\mu$ M) were activated with anti-CD3, anti-CD28 for 10  
9 min. Surface markers and intracellular p-S6 and p-AKT were stained with fluorescent  
10 antibodies and detected using flowcytometer. Showing are p-S6 (top panel) and p-AKT  
11 (Lower panel) MFI ratio to activated, gated on Live/Dead-Yellow<sup>-</sup>CD3<sup>+</sup>CD8<sup>+</sup> T cells.  
12 Results are compared using Student's t test or One-way ANOVA Multicomparisons (\*  $P <$   
13 0.05; \*\*  $P <$ 0.01; \*\*\*  $P <$ 0.001).

14

15 Figure 6. mTORc is required for CD8<sup>+</sup> T cell effector function through promoting transcriptional  
16 activity of T-bet through a redox-regulated regulated mechanism. (A) Quantitation of  
17 intracellular staining of the IFN $\gamma$ , granzyme B, and TNF $\alpha$  in purified NOD CD8<sup>+</sup> T cells  
18 stimulated by  $\alpha$ -CD3/ $\alpha$ -CD28 for 66 hours in the presence or absence of 20ng/mL rapamycin  
19 followed by re-stimulation with PMA/ionomycin plus Golgi stop for 6 hours. (B) NOD CD8<sup>+</sup>  
20 T cells ( $5 \times 10^4$ ) were stimulated by  $\alpha$ -CD3/ $\alpha$ -CD28 in the presence or absence of 20ng/mL  
21 rapamycin. IFN $\gamma$  was measured by ELISA on day 1, 2 and 3. (C) Intracellular staining for T-  
22 bet in CTL after a 72-hour polyclonal stimulation. NOD CD8<sup>+</sup> T cells were treated with (D)  
23 PAO or BAL or (E) H<sub>2</sub>O<sub>2</sub> or apocynin either with or without activation by  $\alpha$ -CD3/ $\alpha$ -CD28  
24 for 30 minutes. Phosphorylation of S6K was measured by the ratio of phosphorylated S6K

1 and total SK6. Results are from three independent experiments. Untreated NOD CTL were  
2 used as the reference group for normalization among multiple tests. Results are presented as  
3 mean  $\pm$  SEM. Student's t-test was performed to exclude potential batch effects (N.S. not  
4 statistically significant; \*  $P < 0.05$ ; \*\*  $P < 0.01$ ; \*\*\*  $P < 0.001$ )).

5

6 Figure 7. Proposed model of NOX2-mediated redox signaling during activation of CTLs. Upon  
7 activation, NOX2 generates superoxide, which is dismutated into hydrogen peroxide,  
8 probably by superoxide dismutase.  $H_2O_2$  in turn inhibits Tsc1/2. Suppression of Tsc1/2  
9 activity promotes the levels of RheB-GTP, leading to enhanced mTORc1 activity. Up-  
10 regulation of mTORc1 activity promotes T-bet expression and thus facilitates CTL effector  
11 function. NOX, NADPH oxidase;  $O_2^\bullet$ , superoxide;  $H_2O_2$ , hydrogen peroxide; SOD,  
12 superoxide dismutase.

## 1 REFERENCES

- 2 1. Zhang, N., and M. J. Bevan. 2011. CD8(+) T cells: foot soldiers of the immune system. *Immunity*  
3 35: 161-168.
- 4 2. Harty, J. T., A. R. Tvinnereim, and D. W. White. 2000. CD8+ T cell effector mechanisms in  
5 resistance to infection. *Annu Rev Immunol* 18: 275-308.
- 6 3. Araki, K., A. P. Turner, V. O. Shaffer, S. Gangappa, S. A. Keller, M. F. Bachmann, C. P. Larsen,  
7 and R. Ahmed. 2009. mTOR regulates memory CD8 T-cell differentiation. *Nature* 460: 108-112.
- 8 4. Mathieu, M., N. Cotta-Grand, J. F. Daudelin, P. Thebault, and N. Labrecque. 2013. Notch  
9 signaling regulates PD-1 expression during CD8(+) T-cell activation. *Immunol Cell Biol* 91: 82-  
10 88.
- 11 5. Rao, R. R., Q. Li, M. R. Gubbels Bupp, and P. A. Shrikant. 2012. Transcription factor Foxo1  
12 represses T-bet-mediated effector functions and promotes memory CD8(+) T cell differentiation.  
13 *Immunity* 36: 374-387.
- 14 6. Winterbourn, C. C. 2008. Reconciling the chemistry and biology of reactive oxygen species. *Nat*  
15 *Chem Biol* 4: 278-286.
- 16 7. Sklavos, M. M., H. M. Tse, and J. D. Piganelli. 2008. Redox modulation inhibits CD8 T cell  
17 effector function. *Free radical biology & medicine* 45: 1477-1486.
- 18 8. Thayer, T. C., M. Delano, C. Liu, J. Chen, L. E. Padgett, H. M. Tse, M. Annamali, J. D. Piganelli,  
19 L. L. Moldawer, and C. E. Mathews. 2011. Superoxide production by macrophages and T cells is  
20 critical for the induction of autoreactivity and type 1 diabetes. *Diabetes* 60: 2144-2151.
- 21 9. Bedard, K., and K. H. Krause. 2007. The NOX family of ROS-generating NADPH oxidases:  
22 physiology and pathophysiology. *Physiol Rev* 87: 245-313.
- 23 10. Thamsen, M., and U. Jakob. 2011. The redoxome: Proteomic analysis of cellular redox networks.  
24 *Curr Opin Chem Biol* 15: 113-119.
- 25 11. Tse, H. M., T. C. Thayer, C. Steele, C. M. Cuda, L. Morel, J. D. Piganelli, and C. E. Mathews.  
26 2010. NADPH oxidase deficiency regulates Th lineage commitment and modulates  
27 autoimmunity. *J Immunol* 185: 5247-5258.
- 28 12. Horvath, R., D. Rozkova, J. Lastovicka, A. Polouckova, P. Sedlacek, A. Sediva, and R. Spisek.  
29 2011. Expansion of T helper type 17 lymphocytes in patients with chronic granulomatous disease.  
30 *Clin Exp Immunol* 166: 26-33.
- 31 13. Kuhns, D. B., W. G. Alvord, T. Heller, J. J. Feld, K. M. Pike, B. E. Marciano, G. Uzel, S. S.  
32 DeRavin, D. A. Priel, B. P. Soule, K. A. Zarembek, H. L. Malech, S. M. Holland, and J. I. Gallin.  
33 2010. Residual NADPH oxidase and survival in chronic granulomatous disease. *N Engl J Med*  
34 363: 2600-2610.
- 35 14. Kuhns, D. B., A. P. Hsu, D. Sun, K. Lau, D. Fink, P. Griffith, D. W. Huang, D. A. L. Priel, L.  
36 Mendez, S. Kreuzburg, C. S. Zerbe, S. S. De Ravin, H. L. Malech, S. M. Holland, X. Wu, and J.  
37 I. Gallin. 2019. NCF1 (p47(phox))-deficient chronic granulomatous disease: comprehensive  
38 genetic and flow cytometric analysis. *Blood Adv* 3: 136-147.
- 39 15. Chen, J., S. E. Stimpson, G. A. Fernandez-Bueno, and C. E. Mathews. 2018. Mitochondrial  
40 Reactive Oxygen Species and Type 1 Diabetes. *Antioxidants & redox signaling* 29: 1361-1372.
- 41 16. Whitener, R. L., L. Gallo Knight, J. Li, S. Knapp, S. Zhang, M. Annamalai, V. M. Pliner, D. Fu,  
42 I. Radichev, C. Amatya, A. Savinov, A. Yurdagul, Jr., S. Yuan, J. Glawe, C. G. Kevil, J. Chen, S.  
43 E. Stimpson, and C. E. Mathews. 2017. The Type 1 Diabetes-Resistance Locus Idd22 Controls  
44 Trafficking of Autoreactive CTLs into the Pancreatic Islets of NOD Mice. *J Immunol* 199: 3991-  
45 4000.
- 46 17. Newby, B. N., and C. E. Mathews. 2017. Type I Interferon Is a Catastrophic Feature of the  
47 Diabetic Islet Microenvironment. *Front Endocrinol (Lausanne)* 8: 232.



- 1 18. Newby, B. N., T. M. Brusko, B. Zou, M. A. Atkinson, M. Clare-Salzler, and C. E. Mathews.  
2 2017. Type 1 Interferons Potentiate Human CD8(+) T-Cell Cytotoxicity Through a STAT4- and  
3 Granzyme B-Dependent Pathway. *Diabetes* 66: 3061-3071.
- 4 19. Daneman, D. 2006. Type 1 diabetes. *Lancet* 367: 847-858.
- 5 20. Anderson, M. S., and J. A. Bluestone. 2005. The NOD mouse: a model of immune dysregulation.  
6 *Annu Rev Immunol* 23: 447-485.
- 7 21. Willcox, A., S. J. Richardson, A. J. Bone, A. K. Foulis, and N. G. Morgan. 2009. Analysis of  
8 islet inflammation in human type 1 diabetes. *Clin Exp Immunol* 155: 173-181.
- 9 22. Tsai, S., A. Shameli, and P. Santamaria. 2008. CD8+ T cells in type 1 diabetes. *Advances in*  
10 *immunology* 100: 79-124.
- 11 23. Lee, H. M., D. M. Shin, K. K. Kim, J. S. Lee, T. H. Paik, and E. K. Jo. 2009. Roles of reactive  
12 oxygen species in CXCL8 and CCL2 expression in response to the 30-kDa antigen of  
13 *Mycobacterium tuberculosis*. *J Clin Immunol* 29: 46-56.
- 14 24. Roep, B. O. 2008. Islet autoreactive CD8 T-cells in type 1 diabetes: licensed to kill? *Diabetes* 57:  
15 1156.
- 16 25. Liu, C., R. L. Whitener, A. Lin, Y. Xu, J. Chen, A. Savinov, J. W. Leiding, M. A. Wallet, and C.  
17 E. Mathews. 2019. Neutrophil Cytosolic Factor 1 in Dendritic Cells Promotes Autoreactive  
18 CD8(+) T Cell Activation via Cross-Presentation in Type 1 Diabetes. *Frontiers in immunology*  
19 10: 952.
- 20 26. Chen, J., and C. E. Mathews. 2014. Use of chemical probes to detect mitochondrial ROS by flow  
21 cytometry and spectrofluorometry. *Methods Enzymol* 542: 223-241.
- 22 27. Li, Y., P. Y. Lee, E. S. Kellner, M. Paulus, J. Switanek, Y. Xu, H. Zhuang, E. S. Sobel, M. S.  
23 Segal, M. Satoh, and W. H. Reeves. 2010. Monocyte surface expression of Fcγ receptor RI  
24 (CD64), a biomarker reflecting type-I interferon levels in systemic lupus erythematosus. *Arthritis*  
25 *Res Ther* 12: R90.
- 26 28. Zhuang, H., S. Han, Y. Xu, Y. Li, H. Wang, L. J. Yang, and W. H. Reeves. 2014. Toll-like  
27 receptor 7-stimulated tumor necrosis factor alpha causes bone marrow damage in systemic lupus  
28 erythematosus. *Arthritis Rheumatol* 66: 140-151.
- 29 29. Chaparro, R. J., A. R. Burton, D. V. Serreze, D. A. Vignali, and T. P. DiLorenzo. 2008. Rapid  
30 identification of MHC class I-restricted antigens relevant to autoimmune diabetes using  
31 retrogenic T cells. *J Immunol Methods* 335: 106-115.
- 32 30. Mukhopadhyaya, A., T. Hanafusa, I. Jarchum, Y. G. Chen, Y. Iwai, D. V. Serreze, R. M.  
33 Steinman, K. V. Tarbell, and T. P. DiLorenzo. 2008. Selective delivery of beta cell antigen to  
34 dendritic cells in vivo leads to deletion and tolerance of autoreactive CD8+ T cells in NOD mice.  
35 *Proc Natl Acad Sci U S A* 105: 6374-6379.
- 36 31. Weinstein, J. S., M. J. Delano, Y. Xu, K. M. Kelly-Scumpia, D. C. Nacionales, Y. Li, P. Y. Lee,  
37 P. O. Scumpia, L. Yang, E. Sobel, L. L. Moldawer, and W. H. Reeves. 2013. Maintenance of  
38 anti-Sm/RNP autoantibody production by plasma cells residing in ectopic lymphoid tissue and  
39 bone marrow memory B cells. *J Immunol* 190: 3916-3927.
- 40 32. Xu, Y., P. Y. Lee, Y. Li, C. Liu, H. Zhuang, S. Han, D. C. Nacionales, J. Weinstein, C. E.  
41 Mathews, L. L. Moldawer, S. W. Li, M. Satoh, L. J. Yang, and W. H. Reeves. 2012. Pleiotropic  
42 IFN-dependent and -independent effects of IRF5 on the pathogenesis of experimental lupus. *J*  
43 *Immunol* 188: 4113-4121.
- 44 33. Lee, P. Y., Y. Kumagai, Y. Xu, Y. Li, T. Barker, C. Liu, E. S. Sobel, O. Takeuchi, S. Akira, M.  
45 Satoh, and W. H. Reeves. 2011. IL-1α modulates neutrophil recruitment in chronic  
46 inflammation induced by hydrocarbon oil. *J Immunol* 186: 1747-1754.
- 47 34. Chen, J., S. Grieshaber, and C. E. Mathews. 2011. Methods to assess beta cell death mediated by  
48 cytotoxic T lymphocytes. *J Vis Exp*.



- 1 35. Chen, J., A. M. Gusdon, J. Piganelli, E. H. Leiter, and C. E. Mathews. 2011. mt-Nd2(a) Modifies  
2 resistance against autoimmune type 1 diabetes in NOD mice at the level of the pancreatic beta-  
3 cell. *Diabetes* 60: 355-359.
- 4 36. Hamaguchi, K., H. R. Gaskins, and E. H. Leiter. 1991. NIT-1, a pancreatic beta-cell line  
5 established from a transgenic NOD/Lt mouse. *Diabetes* 40: 842-849.
- 6 37. Jackson, S. H., S. Devadas, J. Kwon, L. A. Pinto, and M. S. Williams. 2004. T cells express a  
7 phagocyte-type NADPH oxidase that is activated after T cell receptor stimulation. *Nat Immunol*  
8 5: 818-827.
- 9 38. Chi, H. 2012. Regulation and function of mTOR signalling in T cell fate decisions. *Nat Rev*  
10 *Immunol* 12: 325-338.
- 11 39. Intlekofer, A. M., N. Takemoto, E. J. Wherry, S. A. Longworth, J. T. Northrup, V. R. Palanivel,  
12 A. C. Mullen, C. R. Gasink, S. M. Kaech, J. D. Miller, L. Gapin, K. Ryan, A. P. Russ, T.  
13 Lindsten, J. S. Orange, A. W. Goldrath, R. Ahmed, and S. L. Reiner. 2005. Effector and memory  
14 CD8+ T cell fate coupled by T-bet and eomesodermin. *Nat Immunol* 6: 1236-1244.
- 15 40. Szabo, S. J., B. M. Sullivan, C. Stemmann, A. R. Satoskar, B. P. Sleckman, and L. H. Glimcher.  
16 2002. Distinct effects of T-bet in TH1 lineage commitment and IFN-gamma production in CD4  
17 and CD8 T cells. *Science* 295: 338-342.
- 18 41. Szabo, S. J., S. T. Kim, G. L. Costa, X. Zhang, C. G. Fathman, and L. H. Glimcher. 2000. A  
19 novel transcription factor, T-bet, directs Th1 lineage commitment. *Cell* 100: 655-669.
- 20 42. Macias-Perez, M. E., F. Martinez-Ramos, M. Padilla, II, J. Correa-Basurto, L. Kispert, J. E.  
21 Mendieta-Wejebe, and M. C. Rosales-Hernandez. 2013. Ethers and esters derived from apocynin  
22 avoid the interaction between p47phox and p22phox subunits of NADPH oxidase: evaluation in  
23 vitro and in silico. *Biosci Rep* 33.
- 24 43. Kraut, E. H., and A. L. Sagone, Jr. 1981. The effect of oxidant injury on the lymphocyte  
25 membrane and functions. *J Lab Clin Med* 98: 697-703.
- 26 44. Gauthier, M. J. 1976. Modification of bacterial respiration by a macromolecular polyanionic  
27 antibiotic produced by a marine *Alteromonas*. *Antimicrob Agents Chemother* 9: 361-366.
- 28 45. Hawkins, B. J., M. Madesh, C. J. Kirkpatrick, and A. B. Fisher. 2007. Superoxide flux in  
29 endothelial cells via the chloride channel-3 mediates intracellular signaling. *Mol Biol Cell* 18:  
30 2002-2012.
- 31 46. Sena, L. A., S. Li, A. Jairaman, M. Prakriya, T. Ezponda, D. A. Hildeman, C. R. Wang, P. T.  
32 Schumacker, J. D. Licht, H. Perlman, P. J. Bryce, and N. S. Chandel. 2013. Mitochondria are  
33 required for antigen-specific T cell activation through reactive oxygen species signaling.  
34 *Immunity* 38: 225-236.
- 35 47. Pacheco, Y., A. P. McLean, J. Rohrbach, F. Porichis, D. E. Kaufmann, and D. G. Kavanagh.  
36 2013. Simultaneous TCR and CD244 signals induce dynamic downmodulation of CD244 on  
37 human antiviral T cells. *J Immunol* 191: 2072-2081.
- 38 48. Yoshida, S., S. Hong, T. Suzuki, S. Nada, A. M. Mannan, J. Wang, M. Okada, K. L. Guan, and  
39 K. Inoki. 2011. Redox regulates mammalian target of rapamycin complex 1 (mTORC1) activity  
40 by modulating the TSC1/TSC2-Rheb GTPase pathway. *J Biol Chem* 286: 32651-32660.
- 41 49. Li, M., L. Zhao, J. Liu, A. Liu, C. Jia, D. Ma, Y. Jiang, and X. Bai. 2010. Multi-mechanisms are  
42 involved in reactive oxygen species regulation of mTORC1 signaling. *Cell Signal* 22: 1469-1476.
- 43 50. Sarbassov, D. D., and D. M. Sabatini. 2005. Redox regulation of the nutrient-sensitive raptor-  
44 mTOR pathway and complex. *J Biol Chem* 280: 39505-39509.
- 45 51. Smith-Garvin, J. E., G. A. Koretzky, and M. S. Jordan. 2009. T cell activation. *Annu Rev*  
46 *Immunol* 27: 591-619.
- 47 52. Gelderman, K. A., M. Hultqvist, A. Pizzolla, M. Zhao, K. S. Nandakumar, R. Mattsson, and R.  
48 Holmdahl. 2007. Macrophages suppress T cell responses and arthritis development in mice by  
49 producing reactive oxygen species. *J Clin Invest* 117: 3020-3028.

- 1 53. Jackson, S. H., S. Devadas, J. Kwon, L. A. Pinto, and M. S. Williams. 2004. T cells express a  
2 phagocyte-type NADPH oxidase that is activated after T cell receptor stimulation. *Nature*  
3 *Immunology* 5: 818-827.
- 4 54. Kwon, J., K. E. Shatynski, H. Chen, S. Morand, X. de Deken, F. Miot, T. L. Leto, and M. S.  
5 Williams. 2010. The nonphagocytic NADPH oxidase Duox1 mediates a positive feedback loop  
6 during T cell receptor signaling. *Science signaling* 3: ra59.
- 7 55. Yu, H., D. Leitenberg, B. Y. Li, and R. A. Flavell. 2001. Deficiency of small GTPase Rac2  
8 affects T cell activation. *J Exp Med* 194: 915-925.
- 9 56. Chen, J., A. M. Gusdon, T. C. Thayer, and C. E. Mathews. 2008. Role of increased ROS  
10 dissipation in prevention of T1D. *Ann N Y Acad Sci* 1150: 157-166.
- 11 57. La Torre, D., and A. Lernmark. 2010. Immunology of beta-cell destruction. *Adv Exp Med Biol*  
12 654: 537-583.
- 13 58. Sumida, T., M. Furukawa, A. Sakamoto, T. Namekawa, T. Maeda, M. Zijlstra, I. Iwamoto, T.  
14 Koike, S. Yoshida, H. Tomioka, and et al. 1994. Prevention of insulinitis and diabetes in beta 2-  
15 microglobulin-deficient non-obese diabetic mice. *Int Immunol* 6: 1445-1449.
- 16 59. Esensten, J. H., M. R. Lee, L. H. Glimcher, and J. A. Bluestone. 2009. T-bet-deficient NOD mice  
17 are protected from diabetes due to defects in both T cell and innate immune system function. *J*  
18 *Immunol* 183: 75-82.
- 19 60. Juedes, A. E., E. Rodrigo, L. Togher, L. H. Glimcher, and M. G. von Herrath. 2004. T-bet  
20 controls autoaggressive CD8 lymphocyte responses in type 1 diabetes. *J Exp Med* 199: 1153-  
21 1162.
- 22 61. Sasaki, Y., K. Ihara, N. Matsuura, H. Kohno, S. Nagafuchi, R. Kuromaru, K. Kusuhara, R.  
23 Takeya, T. Hoey, H. Sumimoto, and T. Hara. 2004. Identification of a novel type 1 diabetes  
24 susceptibility gene, T-bet. *Hum Genet* 115: 177-184.
- 25 62. Shuvaev, V. V., J. Han, K. J. Yu, S. Huang, B. J. Hawkins, M. Madesh, M. Nakada, and V. R.  
26 Muzykantov. 2011. PECAM-targeted delivery of SOD inhibits endothelial inflammatory  
27 response. *FASEB J* 25: 348-357.
- 28 63. Vieceli Dalla Sega, F., L. Zambonin, D. Fiorentini, B. Rizzo, C. Caliceti, L. Landi, S. Hrelia, and  
29 C. Prata. 2014. Specific aquaporins facilitate Nox-produced hydrogen peroxide transport through  
30 plasma membrane in leukaemia cells. *Biochim Biophys Acta* 1843: 806-814.
- 31 64. Howden, A. J. M., J. L. Hukelmann, A. Brenes, L. Spinelli, L. V. Sinclair, A. I. Lamond, and D.  
32 A. Cantrell. 2019. Quantitative analysis of T cell proteomes and environmental sensors during T  
33 cell differentiation. *Nat Immunol* 20: 1542-1554.
- 34 65. Zeng, H., and H. Chi. 2017. mTOR signaling in the differentiation and function of regulatory and  
35 effector T cells. *Curr Opin Immunol* 46: 103-111.
- 36 66. Pollizzi, K. N., I. H. Sun, C. H. Patel, Y. C. Lo, M. H. Oh, A. T. Waickman, A. J. Tam, R. L.  
37 Blosser, J. Wen, G. M. Delgoffe, and J. D. Powell. 2016. Asymmetric inheritance of mTORC1  
38 kinase activity during division dictates CD8(+) T cell differentiation. *Nat Immunol* 17: 704-711.
- 39 67. Pollizzi, K. N., C. H. Patel, I. H. Sun, M. H. Oh, A. T. Waickman, J. Wen, G. M. Delgoffe, and J.  
40 D. Powell. 2015. mTORC1 and mTORC2 selectively regulate CD8(+) T cell differentiation. *J*  
41 *Clin Invest* 125: 2090-2108.
- 42 68. Pollizzi, K. N., and J. D. Powell. 2015. Regulation of T cells by mTOR: the known knowns and  
43 the known unknowns. *Trends Immunol* 36: 13-20.
- 44 69. Long, X., S. Ortiz-Vega, Y. Lin, and J. Avruch. 2005. Rheb binding to mammalian target of  
45 rapamycin (mTOR) is regulated by amino acid sufficiency. *J Biol Chem* 280: 23433-23436.
- 46 70. Long, X., Y. Lin, S. Ortiz-Vega, K. Yonezawa, and J. Avruch. 2005. Rheb binds and regulates  
47 the mTOR kinase. *Curr Biol* 15: 702-713.
- 48 71. Inoki, K., Y. Li, T. Xu, and K. L. Guan. 2003. Rheb GTPase is a direct target of TSC2 GAP  
49 activity and regulates mTOR signaling. *Genes Dev* 17: 1829-1834.

- 1 72. Hultqvist, M., P. Olofsson, J. Holmberg, B. T. Backstrom, J. Tordsson, and R. Holmdahl. 2004.
- 2 Enhanced autoimmunity, arthritis, and encephalomyelitis in mice with a reduced oxidative burst
- 3 due to a mutation in the *Ncf1* gene. *Proc Natl Acad Sci U S A* 101: 12646-12651.

## Figure 1: A and B

**A**

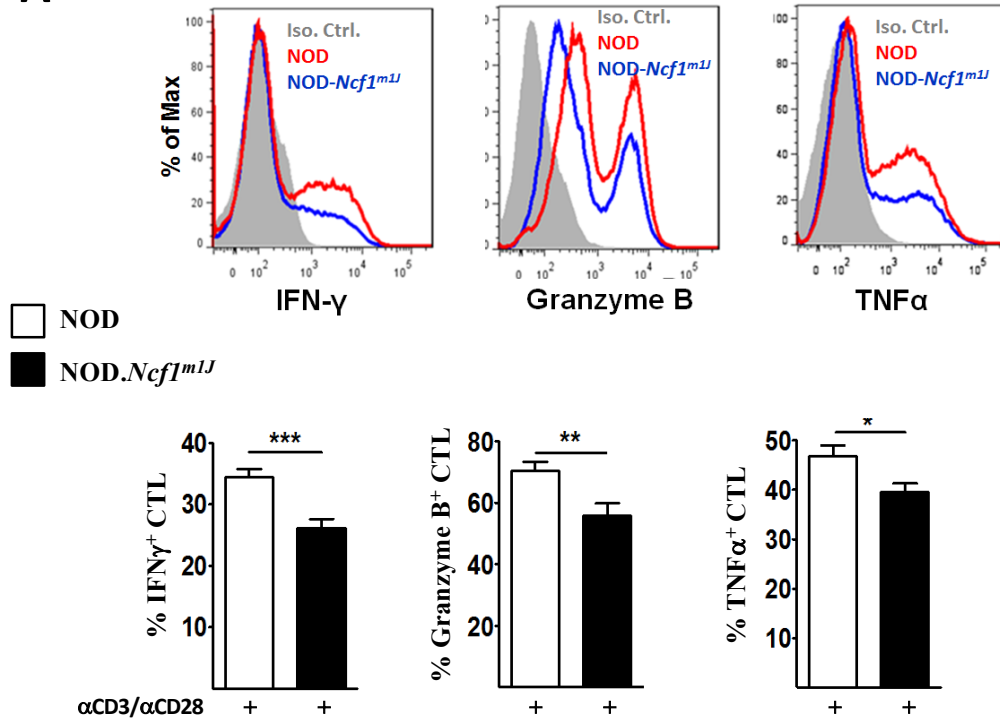

**B**

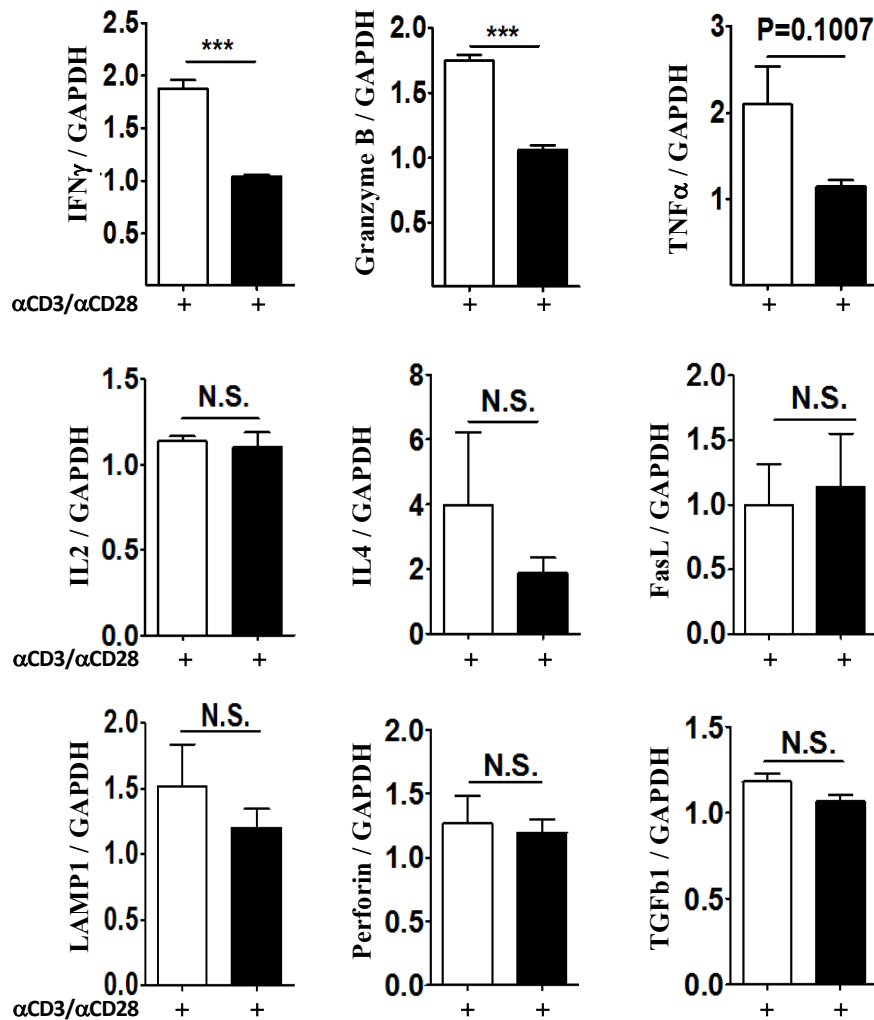

□ NOD

■ NOD.*Ncf1<sup>m1J</sup>*

## Figure 1: C, D, and E

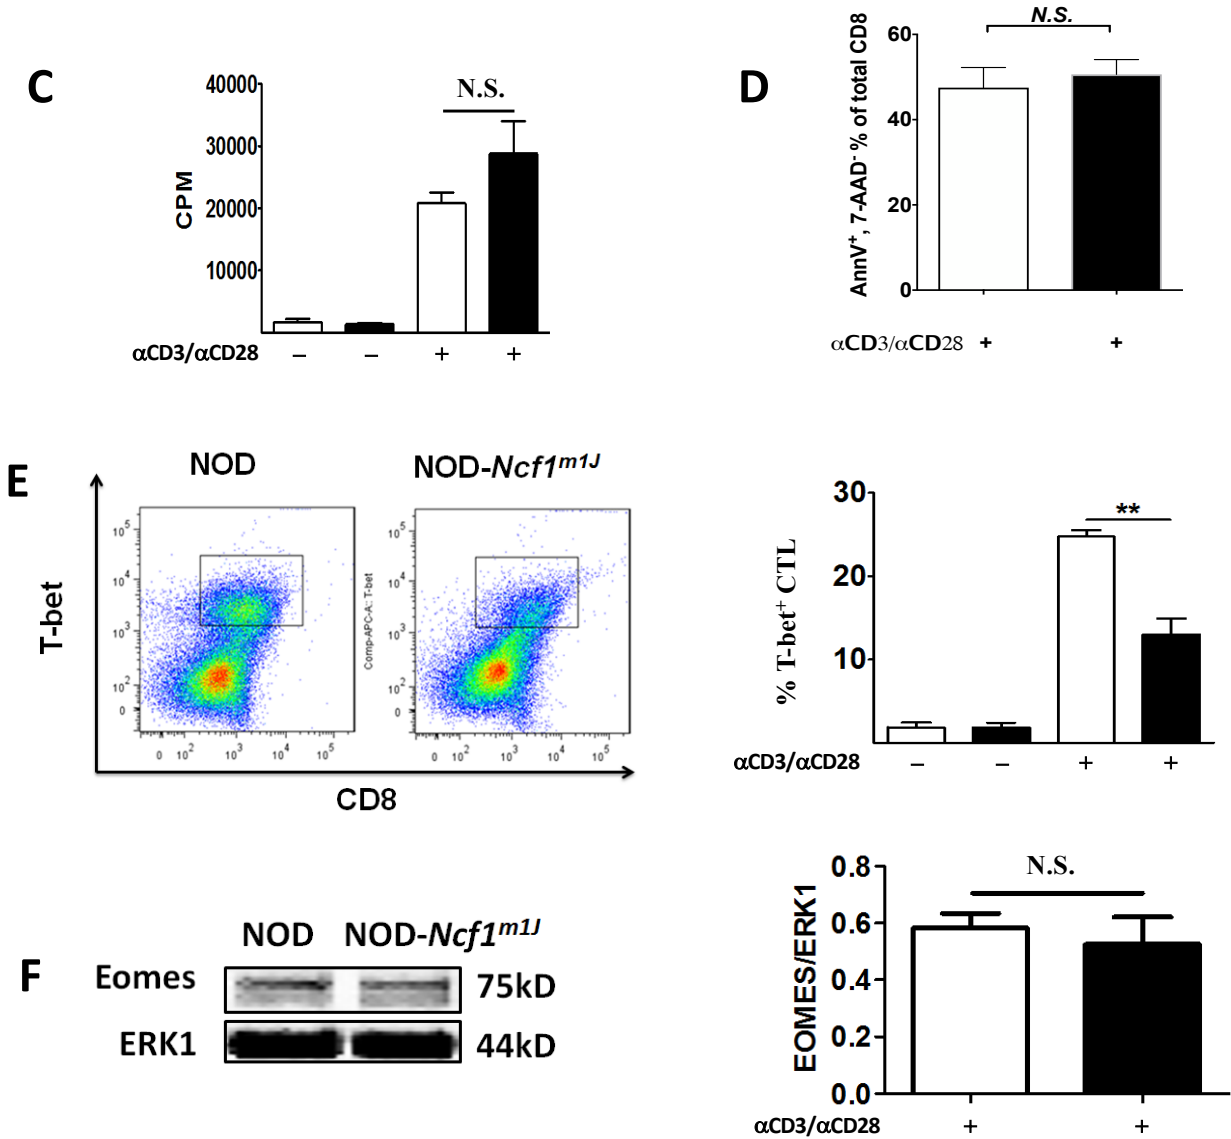

## Figure 2: A-D

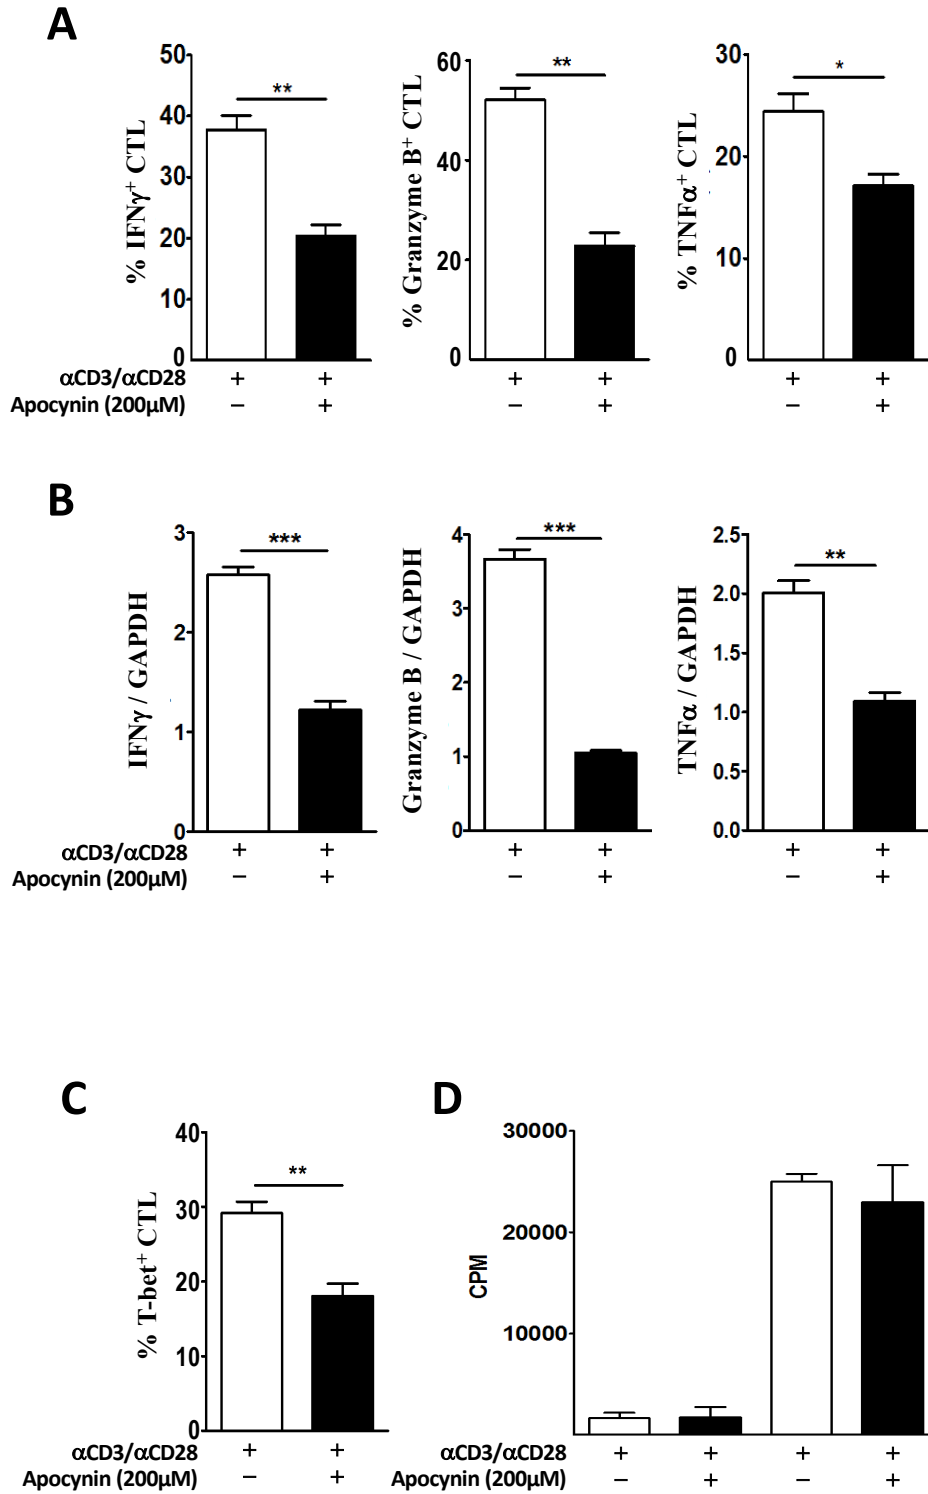

## Figure 2: E and F

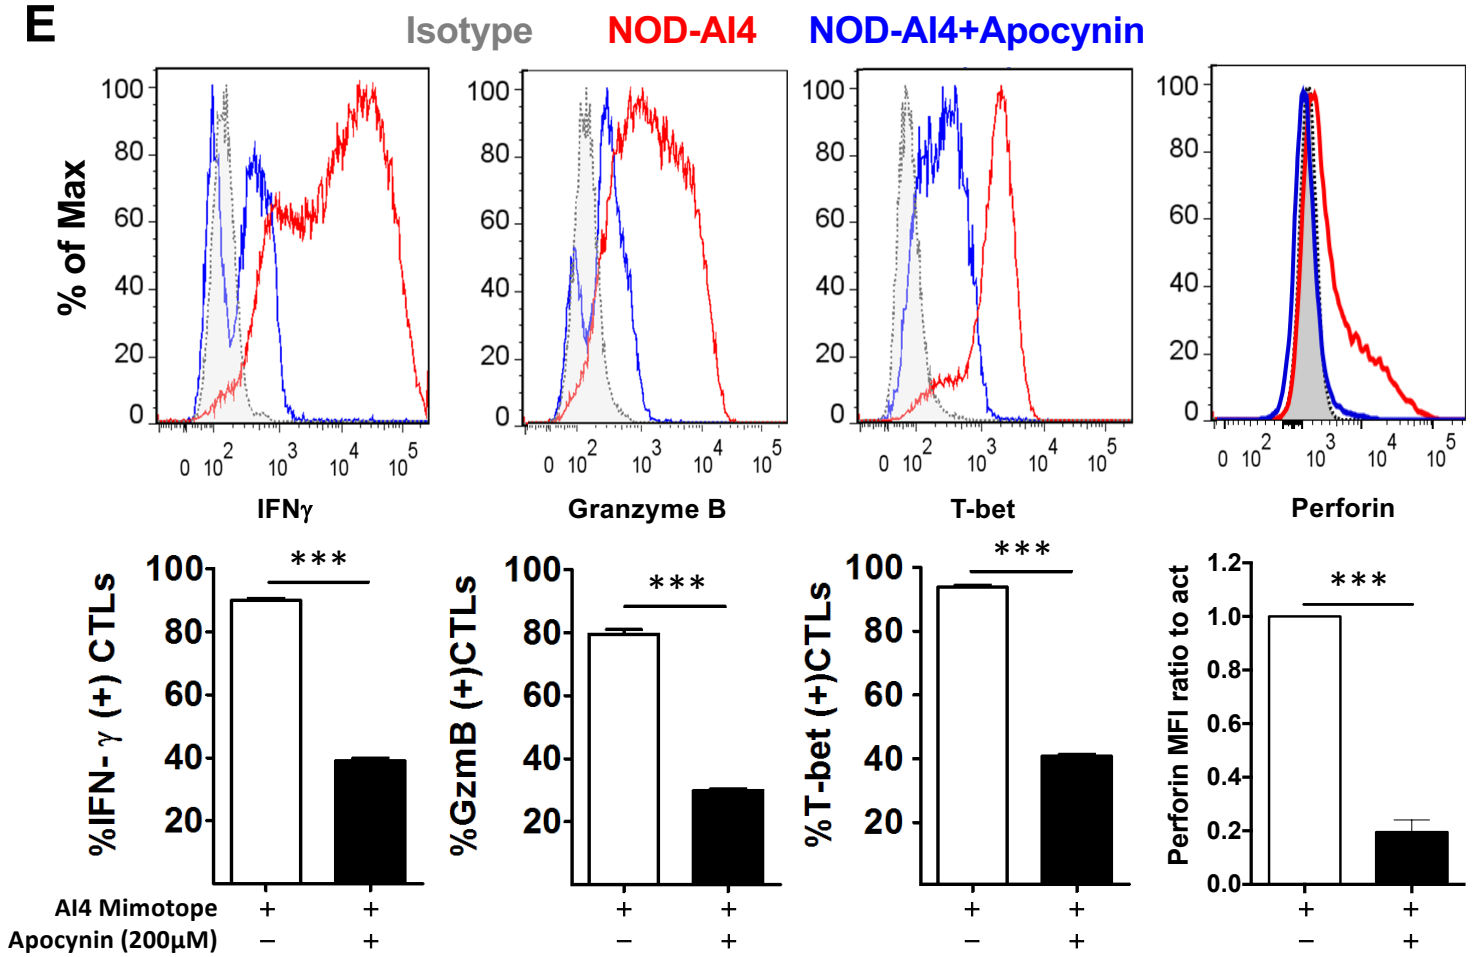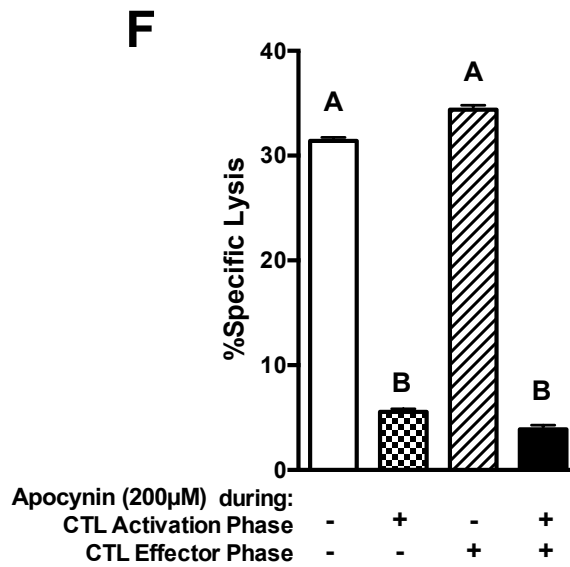

## Figure 3

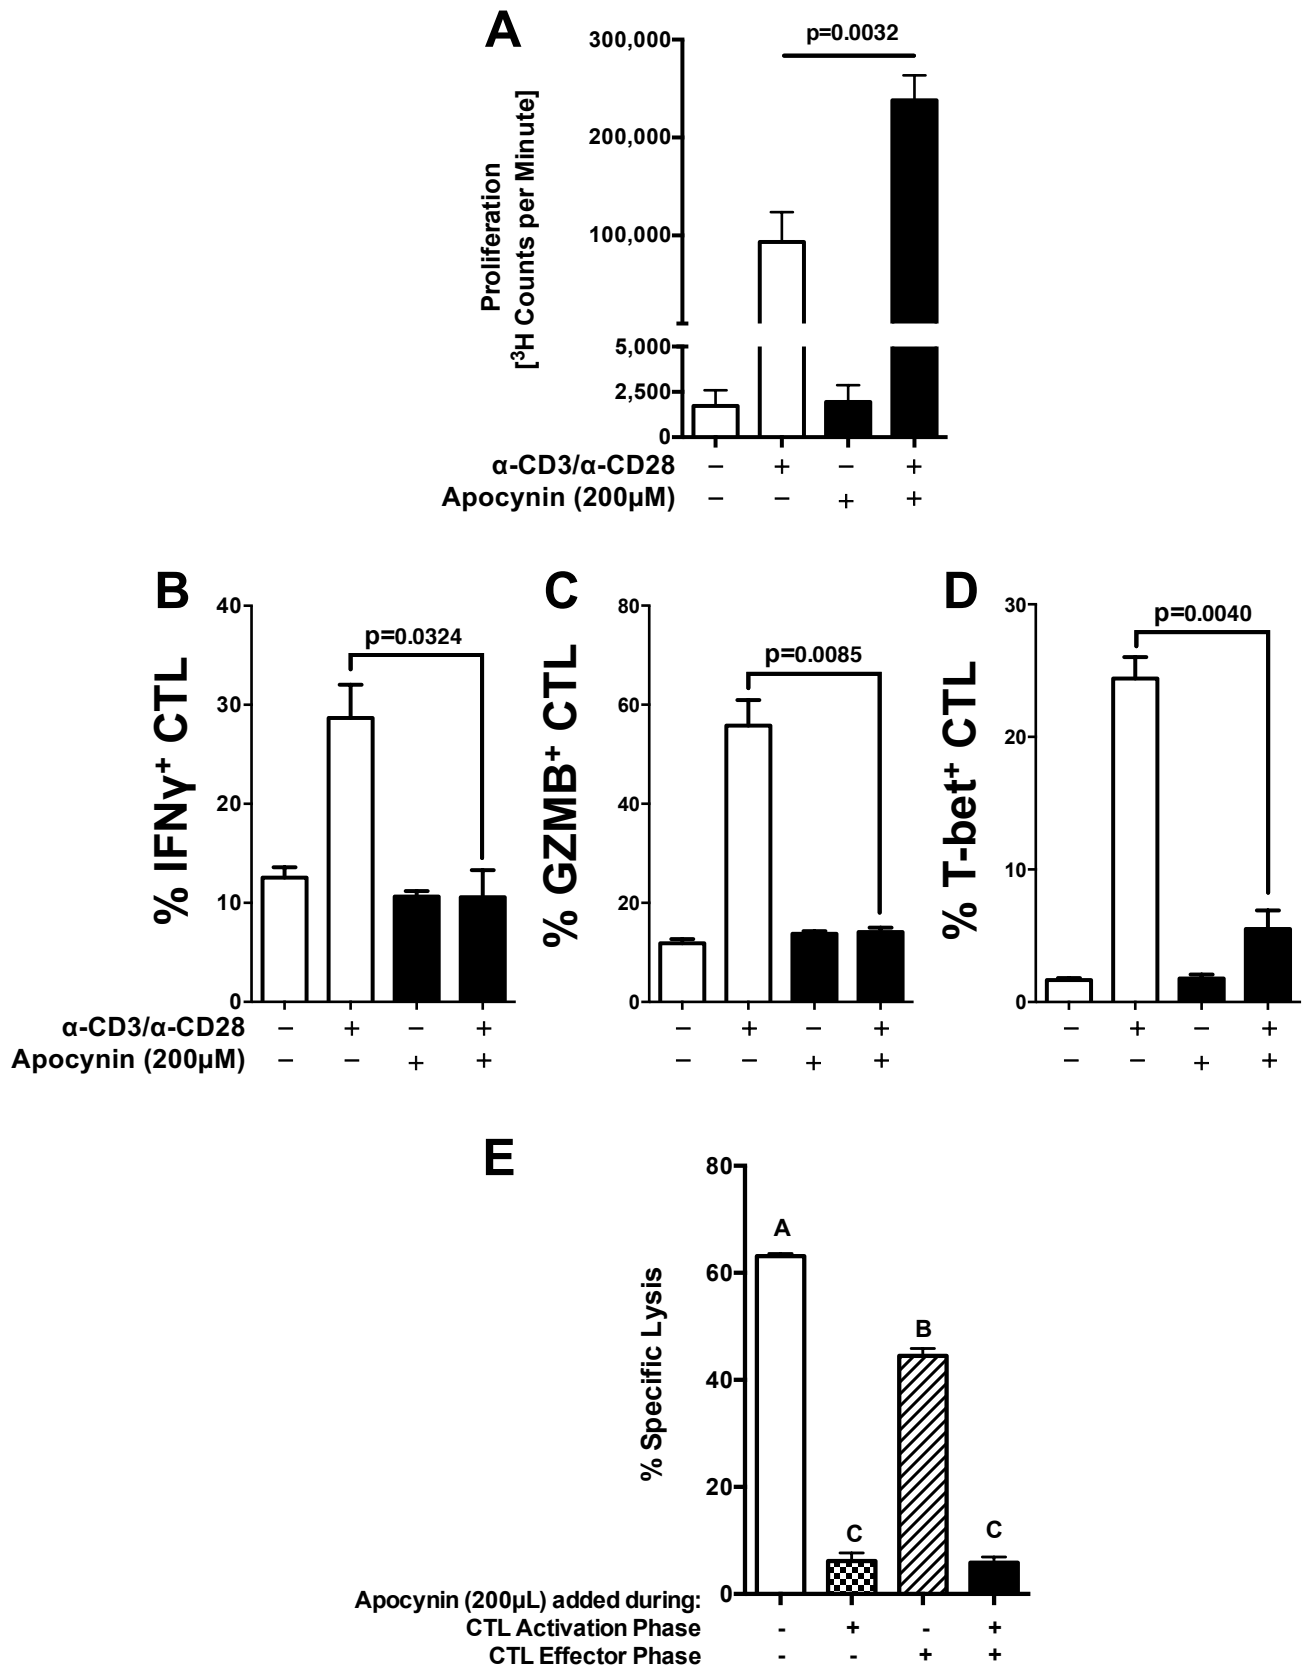



## Figure 4 A and B

**A**

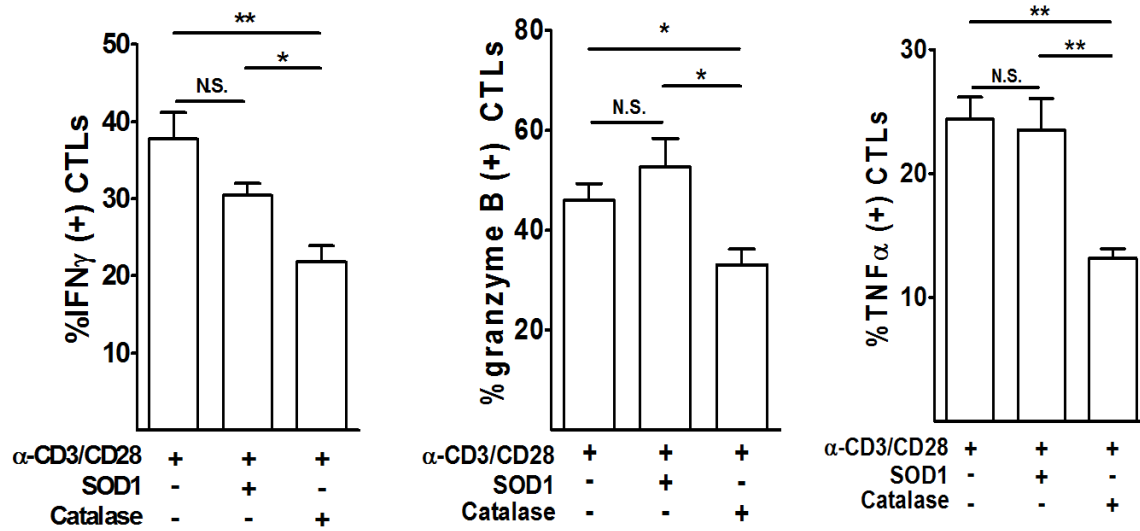

**B**

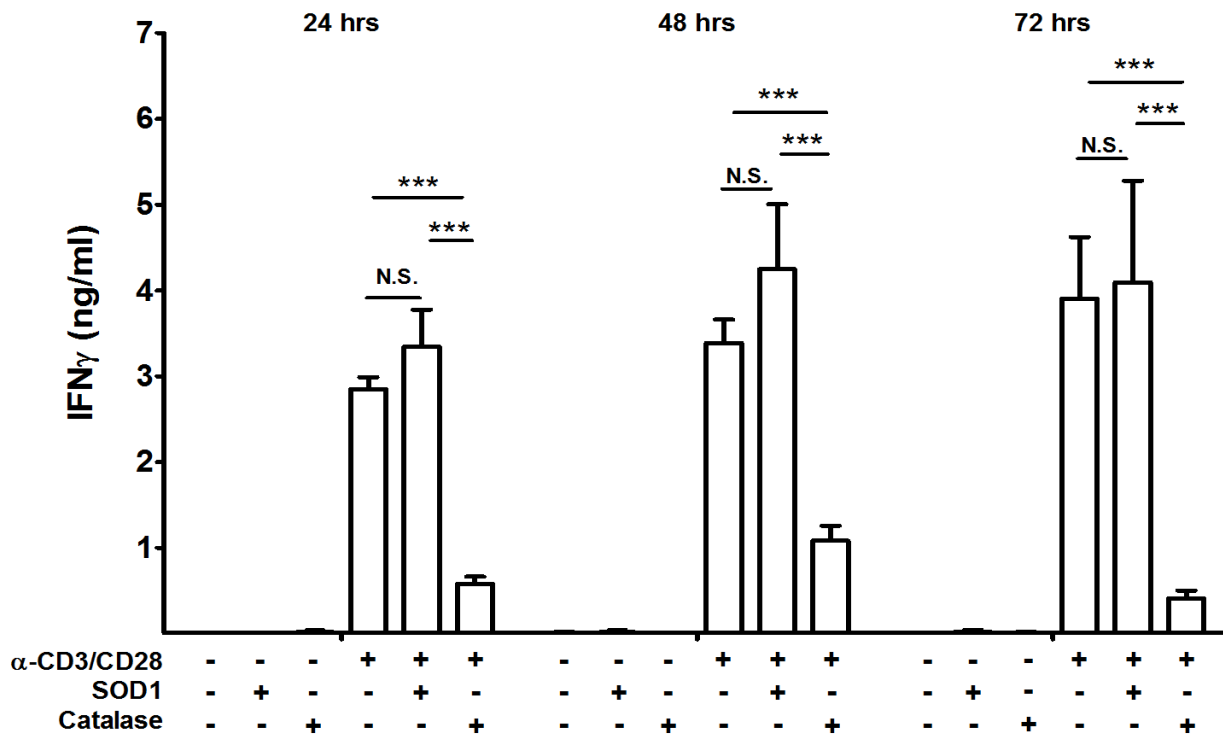

## Figure 4 C, D and E

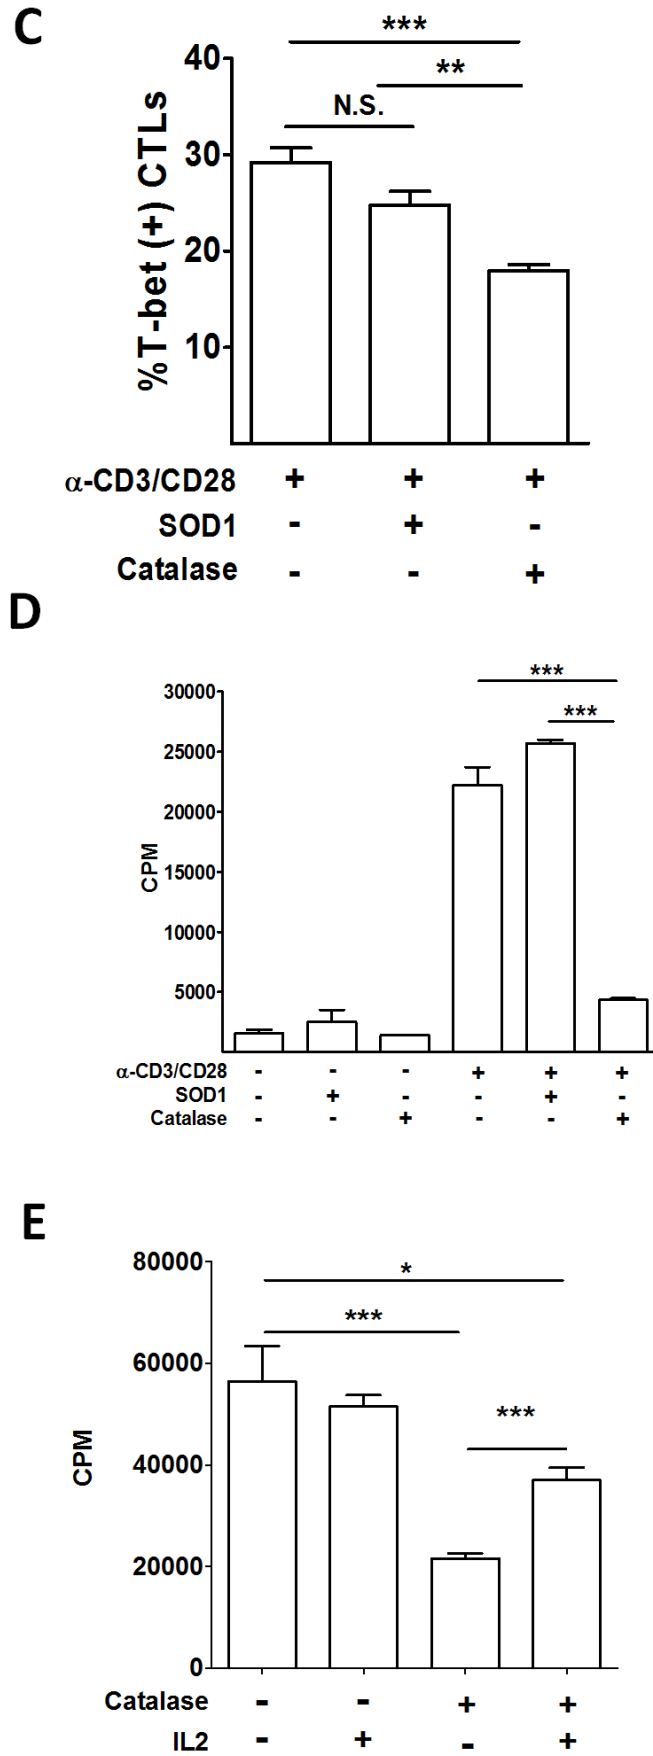

## Figure 5A

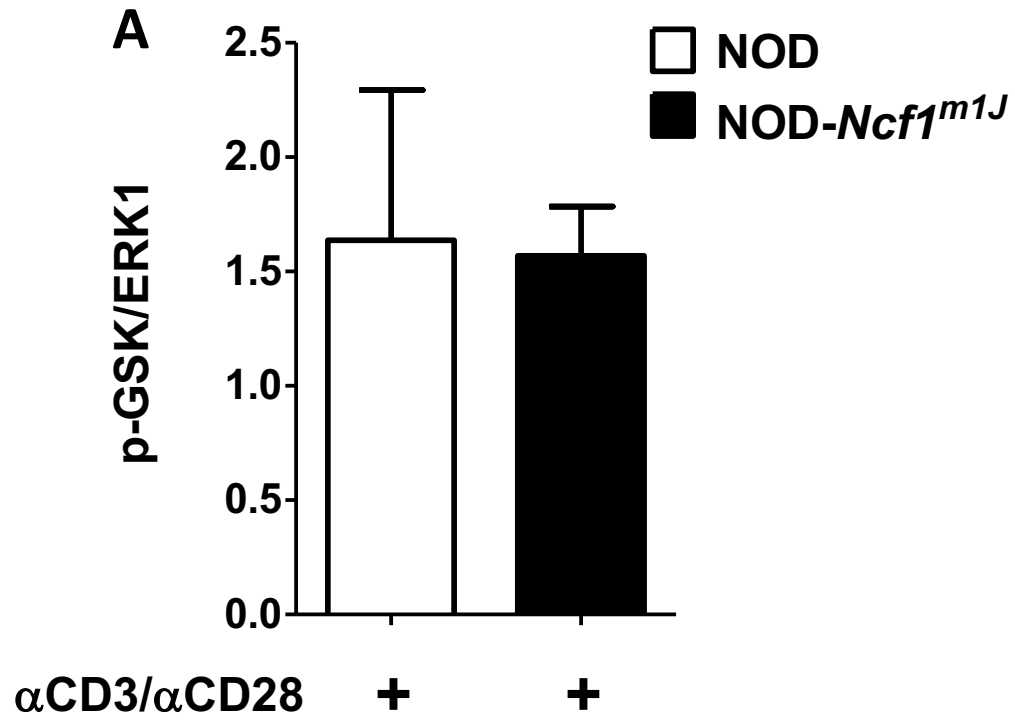

## Figure 5B

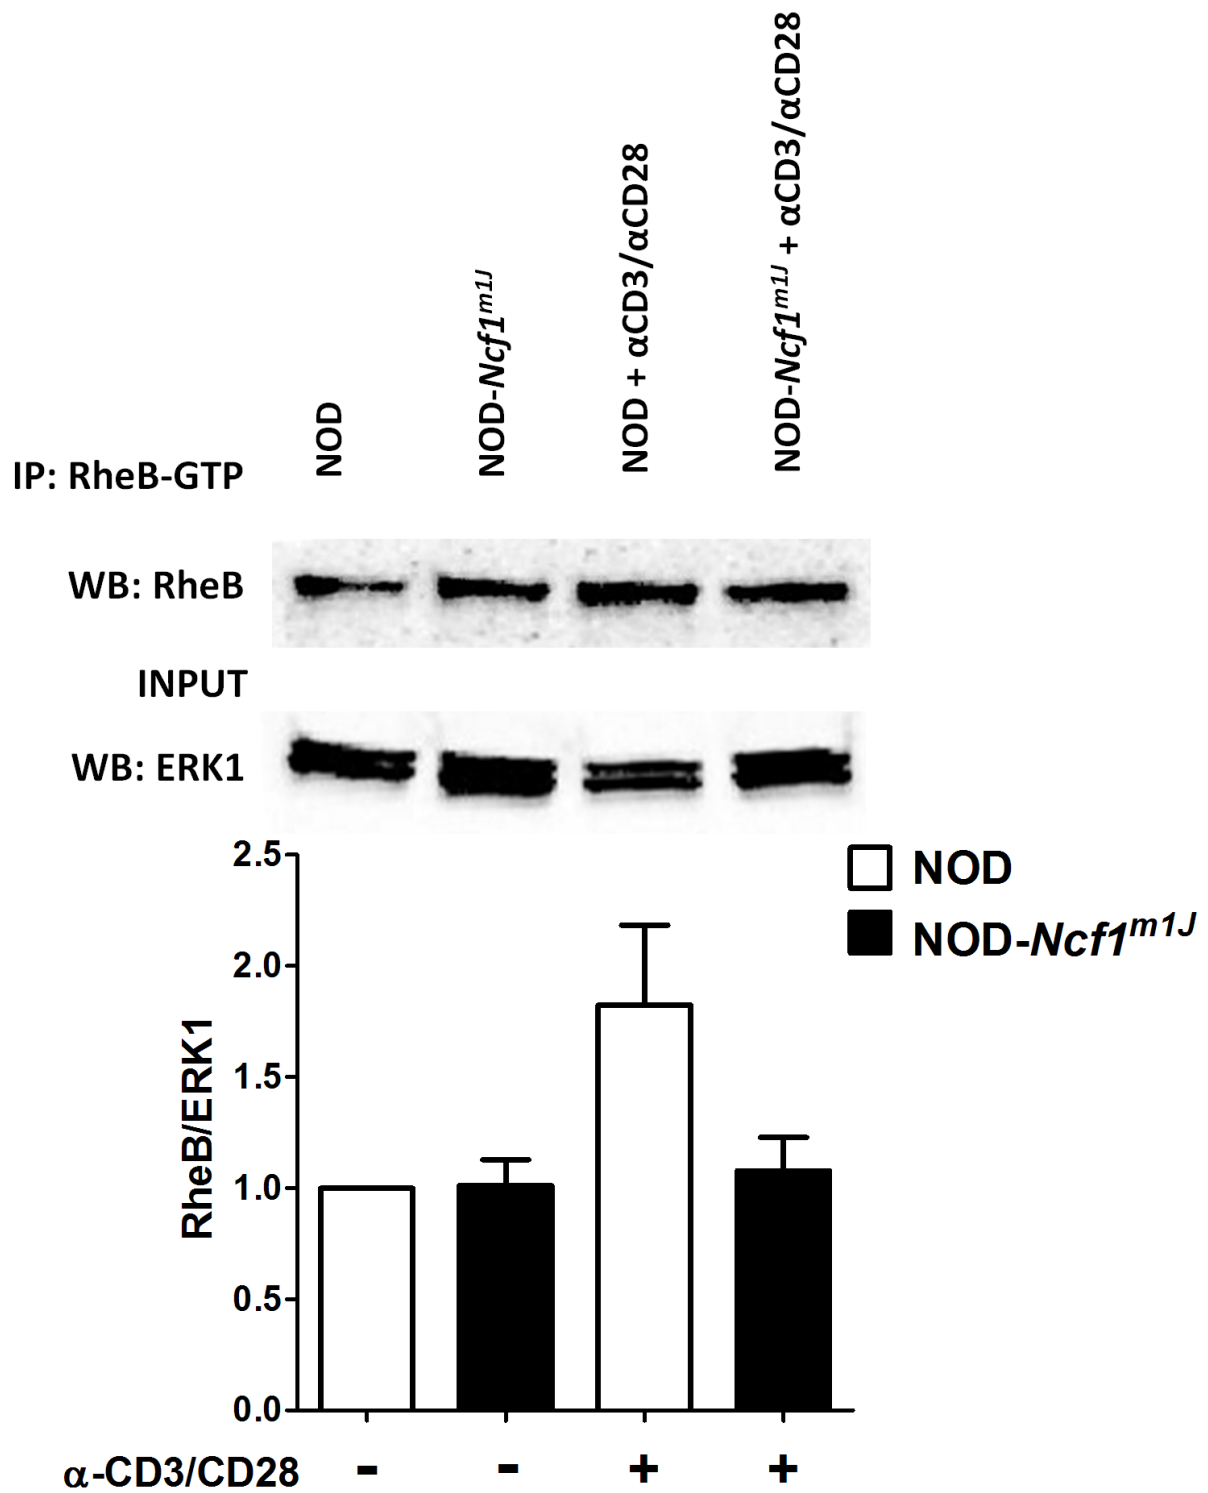

## Figure 5C

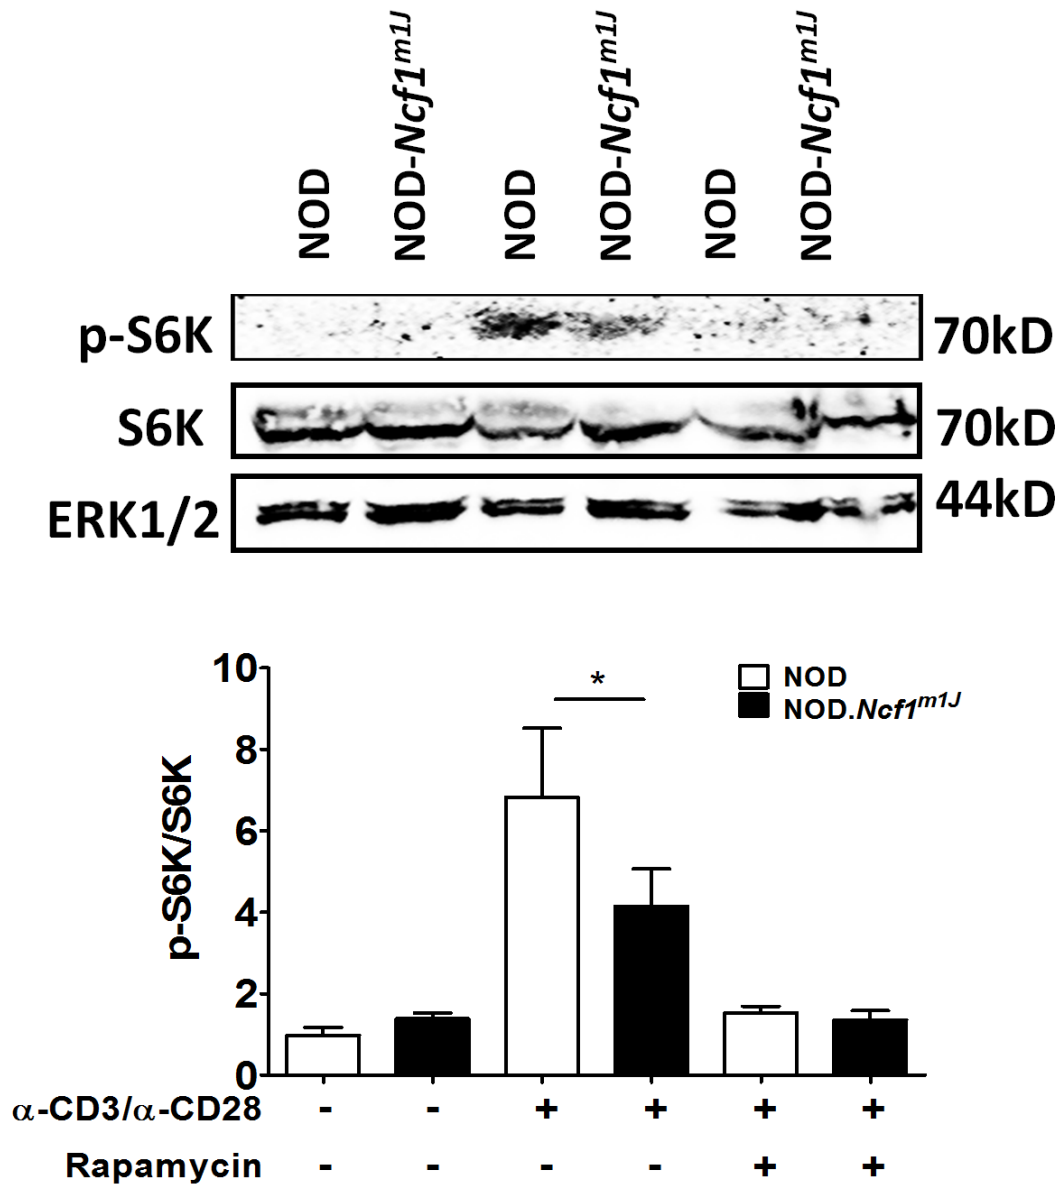

## Figure 5D-F

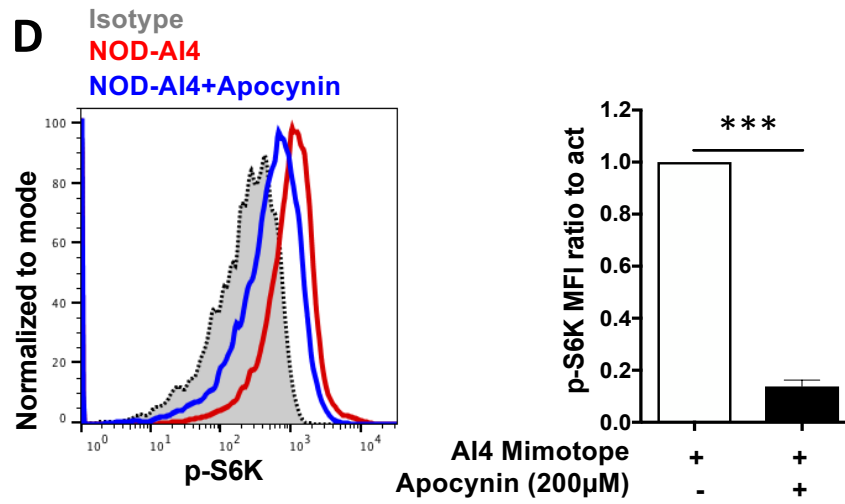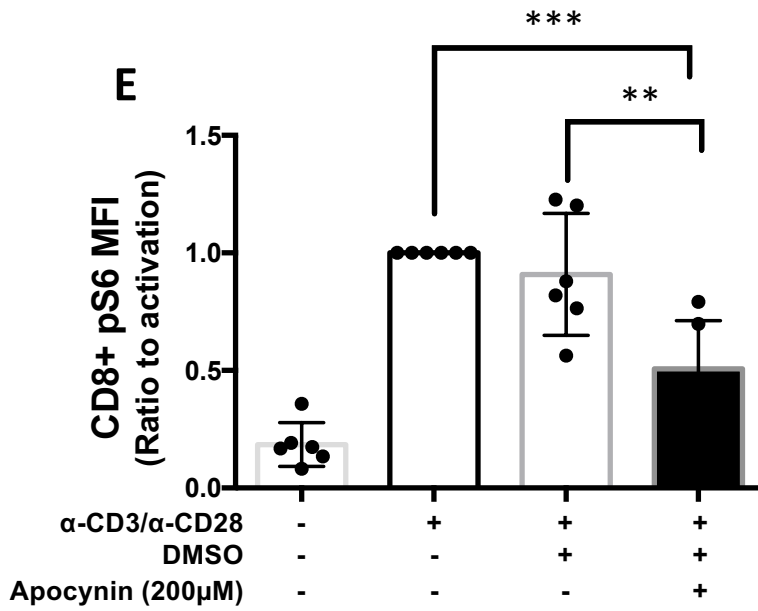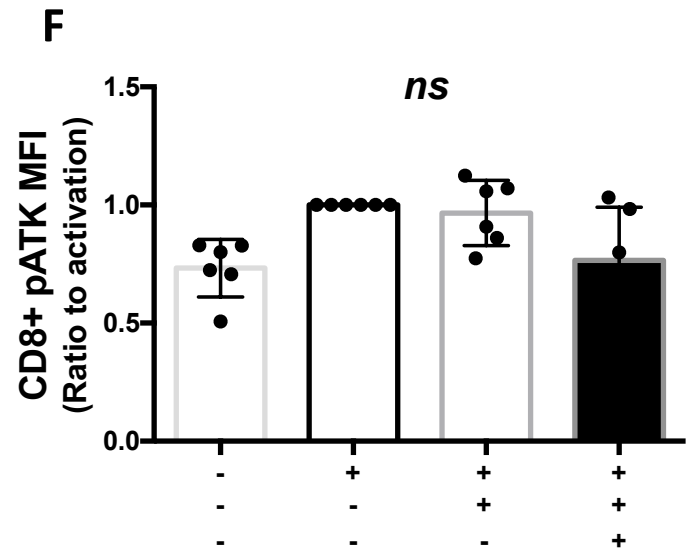

## Figure 6 A and B

### A

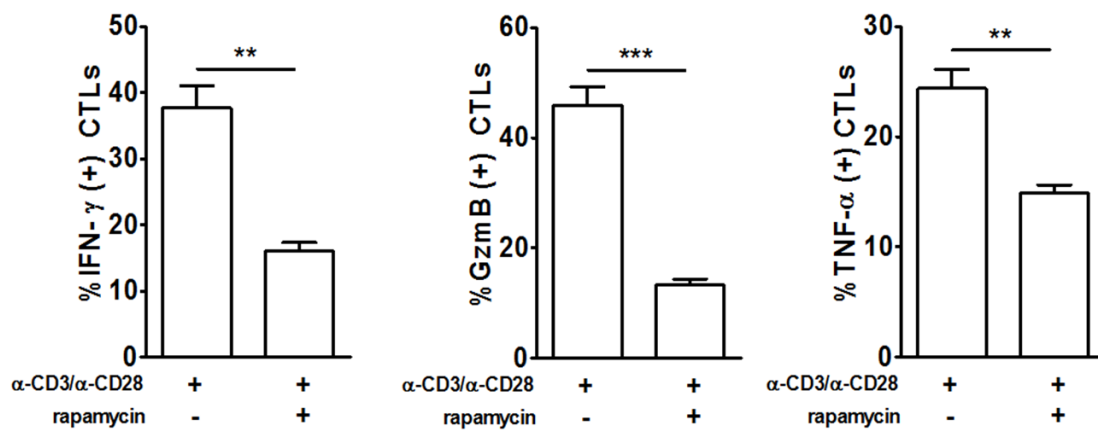

### B

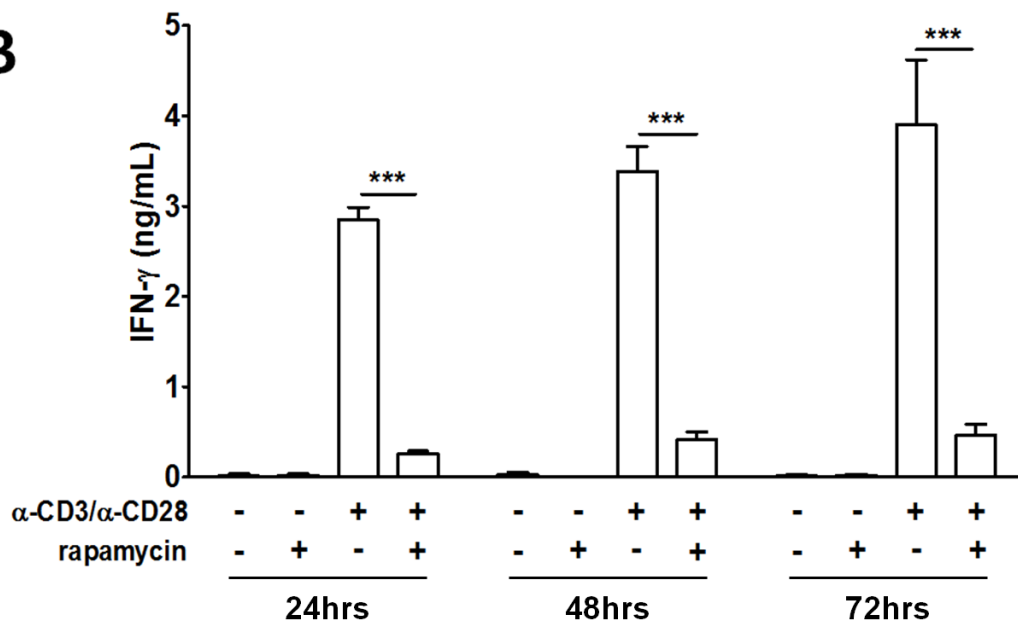

**Figure 6 C**

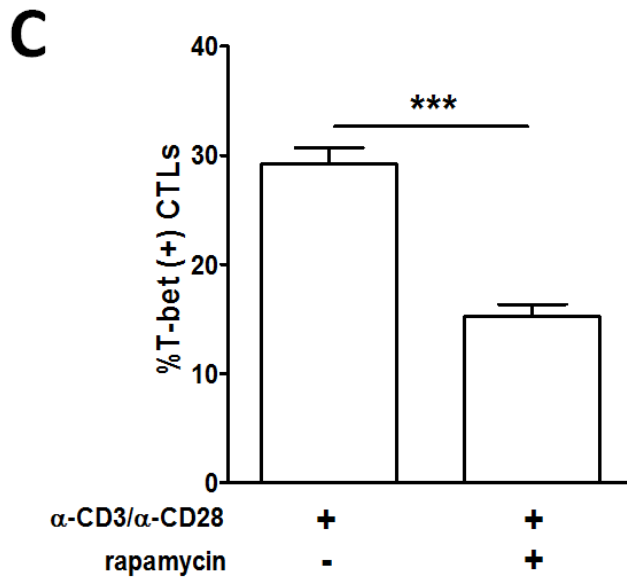



## Figure 6D

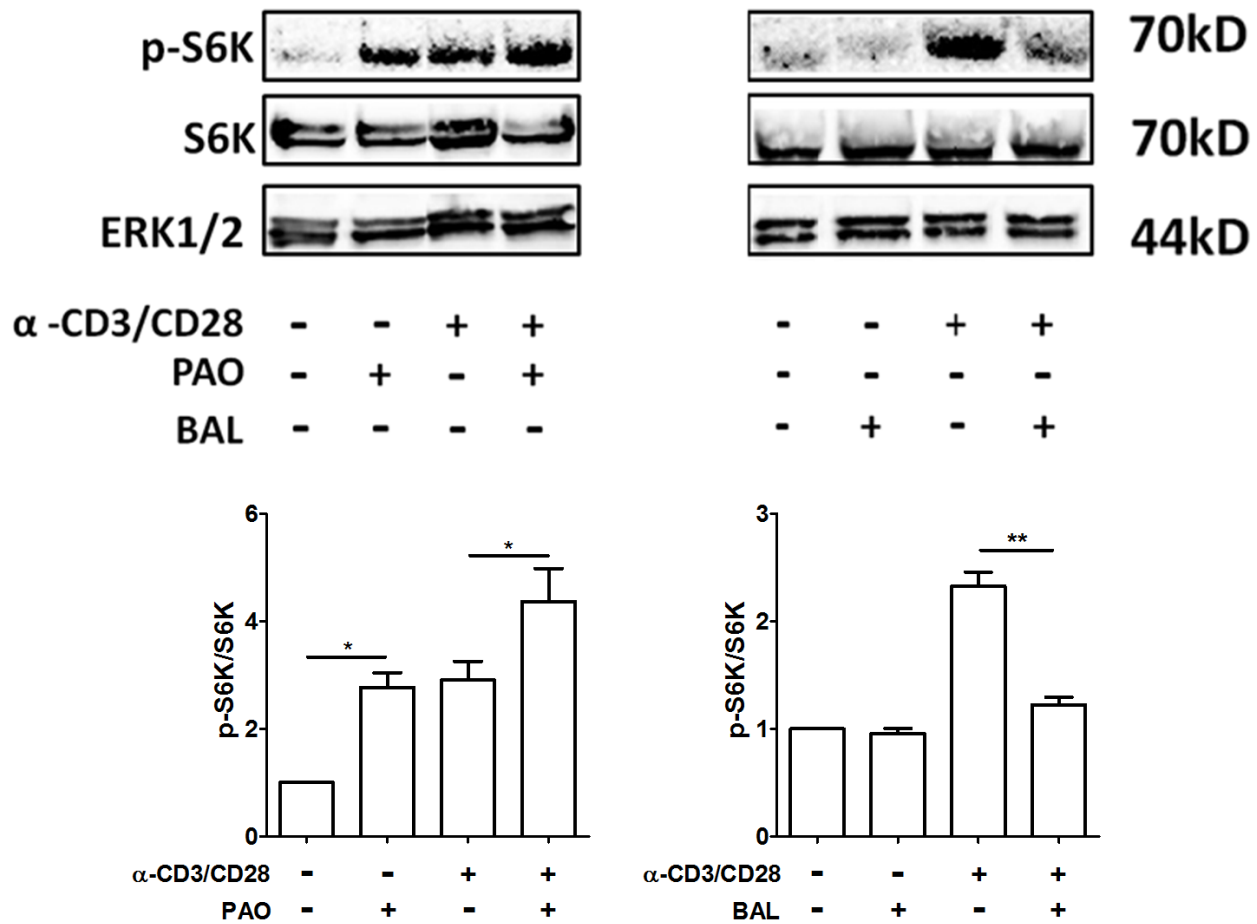

## Figure 6E

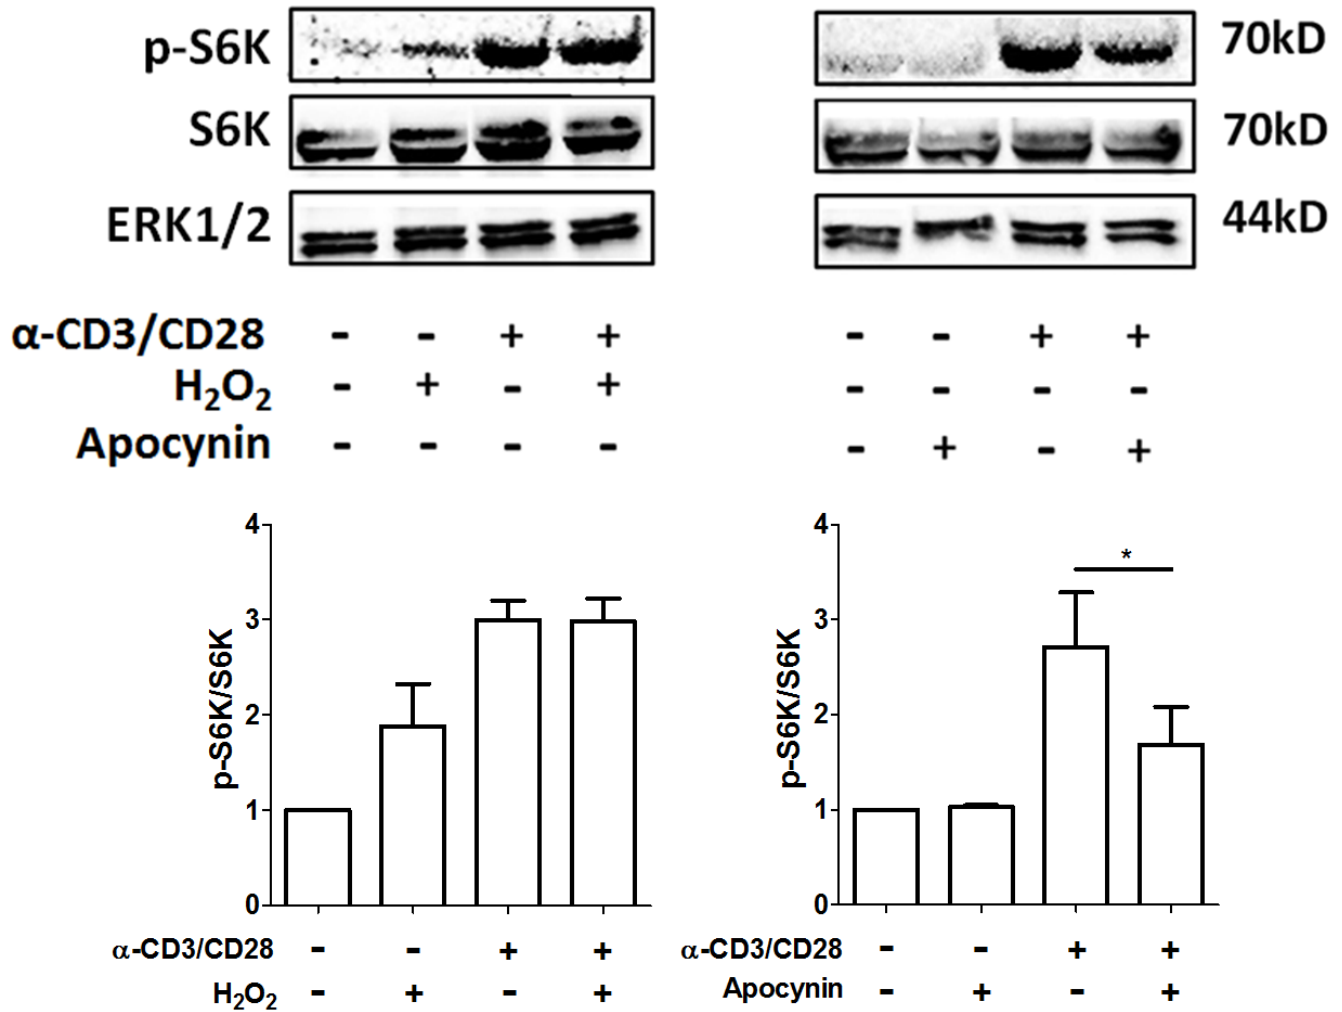

## Figure 7

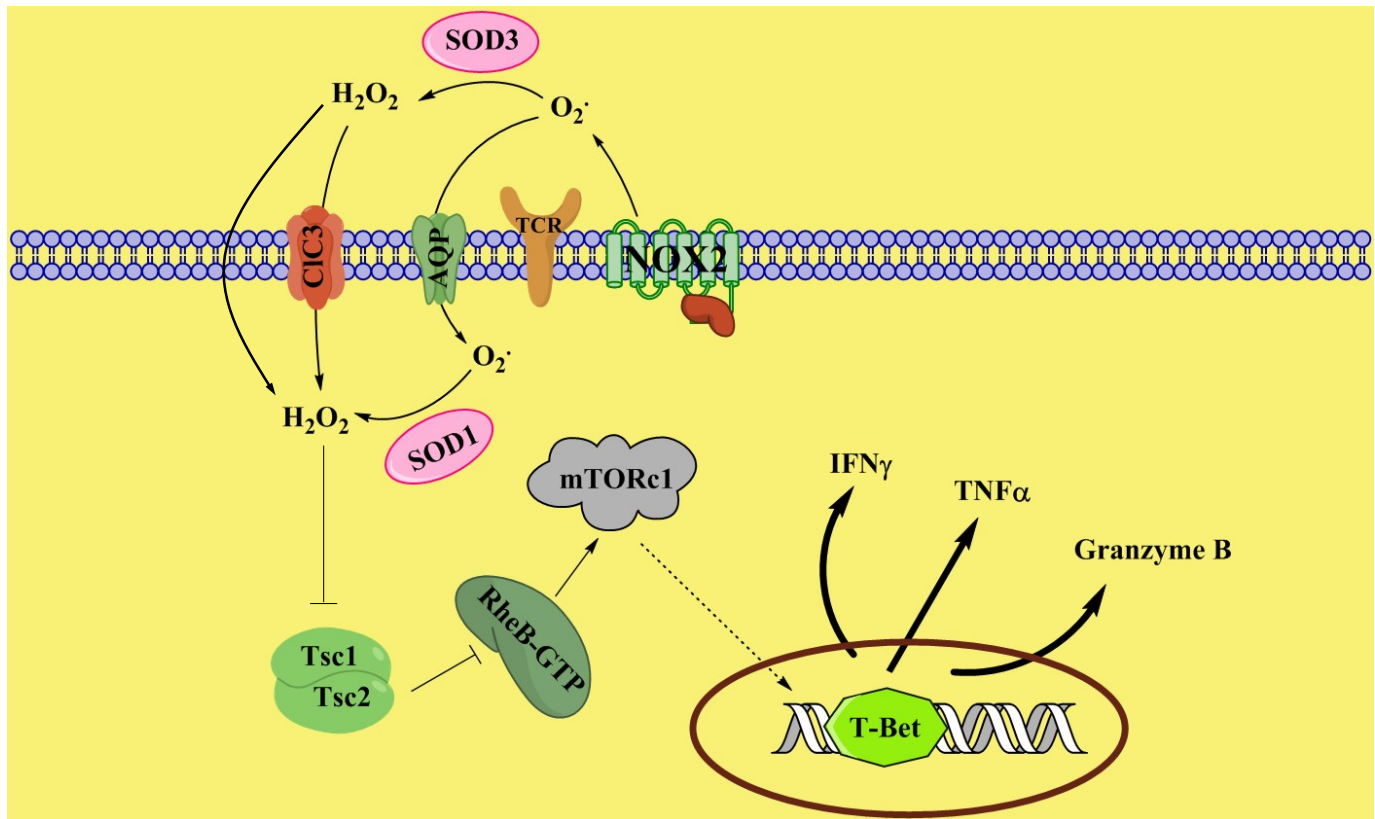

Source: https://www.biorxiv.org/content/10.1101/2021.02.24.432756v2.full.pdf
